1 Somatostatin-expressing neurons in the ventral tegmental area innervate specific  
2 forebrain regions and are involved in the stress response

3

4 Elina Nagaeva<sup>1\*</sup>, Annika Schäfer<sup>1</sup>, Anni-Maija Linden<sup>1</sup>, Lauri V. Elsilä<sup>1</sup>, Maria  
5 Ryazantseva<sup>2</sup>, Juzoh Umemori<sup>3</sup>, Ksenia Egorova<sup>1</sup> & Esa R. Korpi<sup>1\*</sup>

6

7

8 <sup>1</sup> Department of Pharmacology, Faculty of Medicine, University of Helsinki, Helsinki, Finland

9 <sup>2</sup> HiLife Neuroscience Center, University of Helsinki, Helsinki, Finland

10 <sup>3</sup> Gene and Cell technology, A.I. Virtanen Institute for molecular science, University of Eastern Finland,  
11 Kuopio, Finland

12 \* corresponding authors

13

14

15

16

17

18

19

20

21

## 22 Abstract

23 Expanding knowledge about the cellular composition of subcortical brain  
24 regions demonstrates large heterogeneity and differences from the cortical  
25 architecture. Recently, we described three subtypes of somatostatin-expressing (Sst)  
26 neurons in the mouse ventral tegmental area (VTA) and showed their local  
27 inhibitory action on the neighbouring dopaminergic neurons (Nagaeva et al., 2020).  
28 Here, we report that VTA Sst neurons also project far outside the VTA and innervate  
29 several forebrain regions that are mainly involved in the regulation of emotional  
30 behaviour. When we deleted these VTA Sst neurons several behaviours and drug  
31 effects were affected, such as home cage activity, sensitization of locomotor activity  
32 to morphine, fear conditioning responses, and reactions to inescapable stress of  
33 forced swimming, often in a sex-dependent manner. Interestingly, the majority of  
34 these Sst projecting neurons was found to express *Vglut2* and *Th*, but not *Dat*.  
35 Together, these data demonstrate that VTA Sst neurons have their selective  
36 projection targets, which are distinct from the main targets of VTA dopamine  
37 neurons and involved in the regulation of a variety of behaviours mostly associated  
38 with the stress response. This, in turn, makes these VTA neurons a meaningful  
39 addition to the somatostatinergetic system of the brain.

## 40 Introduction

41 The ventral tegmental area (VTA) is a part of the midbrain, from which it sends  
42 neuronal projections to many brain structures. It is mainly recognized as the origin  
43 of two important dopaminergic pathways: the mesolimbic pathway to the ventral  
44 striatum and the mesocortical pathway to the prefrontal cortex, which control  
45 motivation and reward-related processes (Björklund and Dunnett, 2007). However,  
46 the VTA additionally contains two other major neuronal subtypes: neurons releasing  
47 glutamate (Glu) and  $\gamma$ -aminobutyric acid (GABA). In addition to participating in the

48 local circuits and controlling the neighbouring dopamine (DA) cells (Dobi et al., 2010;  
49 Hnasko et al., 2012; Tan et al., 2012), some of these neurons can project outside the  
50 VTA and contribute to larger brain circuits. For example, VTA GABA neurons can  
51 project to distant brain areas and modulate the activity of those areas separately  
52 from DA signalling, by having unique projection targets (Bouarab et al., 2019). It was  
53 shown that continuous activation of the inhibitory projections from the VTA to the  
54 epithalamic lateral habenula promotes rewarding behaviours independently of the  
55 DA neurons (Stamatakis et al., 2013). At the same time, activation of the rostral VTA  
56 GABA neurons projecting to the GABA neurons in the dorsal raphe disinhibits  
57 serotonin neurons and promotes aversion (Li et al., 2019). On the other hand, many  
58 VTA Glu projections travel in parallel with DA pathways (Cai and Tong, 2022),  
59 suggesting their sustaining role in DA signalling. It has also been shown that VTA Glu  
60 neurons projecting to the nucleus accumbens (NAc) could drive positive  
61 reinforcement and promote wakefulness independently from the DA release (Yu et  
62 al., 2019; Zell et al., 2020).

63 Recently, we have described three VTA Sst+ neuron populations with  
64 heterogeneous molecular profiles (75% GABA, 18% Glu, and 5% GABA/Glu), location  
65 within the VTA and electrophysiological properties (Nagaeva et al., 2020). We also  
66 demonstrated that laterally located VTA Sst neurons were able to inhibit  
67 neighbouring DA cells via direct GABAergic transmission. In the present study, we  
68 demonstrate that there are anterolateral VTA Sst neurons that project to distant  
69 forebrain regions and that deletion of these cells affects stress responses, often in a  
70 sex-dependent manner. Interestingly, our data suggest that the majority of the  
71 projecting Sst neurons is positive for *Vglut2* and *Th*.

72

73

## 74 Results

### 75 VTA Sst neurons innervate several forebrain regions

76 To find out whether the Sst neurons project outside the VTA, we injected a  
77 Cre-dependent anterograde tracer unilaterally into the VTA of Sst-Cre mice and  
78 sectioned the whole brain three weeks later to locate the GFP signal of the tracer.  
79 We found VTA Sst projections in several forebrain regions. Then, we defined the  
80 regions, which consistently had the densest axonal arborisations in all brains  
81 studied, using hierarchical clustering and depicted the results as a heatmap (Fig. 1).  
82 The VTA Sst neurons were found to have five main consistent projection targets: the  
83 ventral pallidum (VP), lateral hypothalamus (LH), the medial part of the central  
84 amygdala (CeM), anterolateral division of the bed nucleus of stria terminalis  
85 (alBNST), and paraventricular thalamic nucleus (PVT) (Fig. 1 and 2).

86 Some of the projection targets, such as the LH and VP, are along the way of the  
87 medial forebrain bundle (mfb) – the massive neuronal tract connecting the midbrain  
88 with the forebrain. To confirm that the VTA Sst axons innervate the targets  
89 mentioned and not only pass through, we injected a Cre-dependent retrograde  
90 tracer unilaterally into each of these targets (Fig. 3a). Indeed, injections into the  
91 CeM, LH, BNST and VP, produced GFP expression in the cell bodies of the VTA Sst  
92 neurons located ipsilaterally to the injection site (Fig. S1-S4). However, unilateral  
93 injection of the retrotracer into the PVT produced GFP expression bilaterally in the  
94 VTA (Fig. 3b). Similarly, we saw traced axons in the left and right parts of the  
95 posterior PVT after unilateral VTA injection of the anterograde tracer (Fig. 2b). This  
96 might suggest that either individual VTA Sst neurons can send collaterals to the right  
97 and left parts of the PVT, or different Sst neurons from the same VTA side  
98 innervated the PVT bilaterally. Another explanation may lie in the non-bilateral

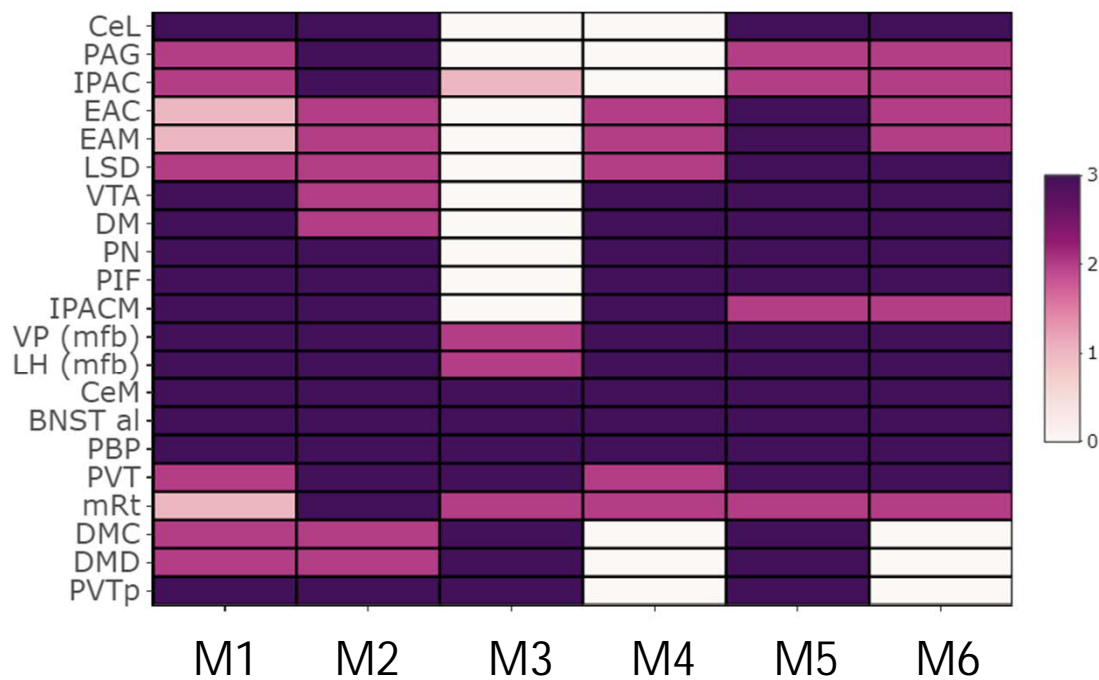

Figure 1. Heatmap of the VIA Sst neuron projections. The brain regions with the densest innervation are shown. Colours indicate the density of the fluorescent axons in the projection site from 0 (no projections) to 3 (highest density). The Y-axis depicts the names of the regions, X-axis shows the mouse number: M1 – mouse 1 and etc.

*BNST al* – bed nucleus of the stria terminalis, antero-lateral part; *CeL* – central amygdala, lateral part; *CeM* – central amygdala, medial part; *DM* – dorsomedial hypothalamic nucleus; *DMC* – DM, compact part; *DMD* – DM, dorsal part; *EAC* – extended amygdala, central part; *EAM* – extended amygdala, medial part; *IPAC* – interstitial nucleus of the posterior limb of the anterior commissure; *IPACM* – IPAC, medial part; *LH* – lateral hypothalamus; *LSD* – lateral septal nucleus, dorsal part; *mRT* – mesencephalic reticular formation; *PAG* – periaqueductal gray; *PBP* – parabrachial pigmented nucleus of the VTA; *PIF* – parainterfascicular nucleus of the VTA; *PN* – paranigral nucleus of VTA; *PVT* – paraventricular nucleus of the thalamus; *PVTp* – PVT, posterior part; *VP (mfb)* – ventral pallidum (medial forebrain bundle); *VTA* – ventral tegmental area.

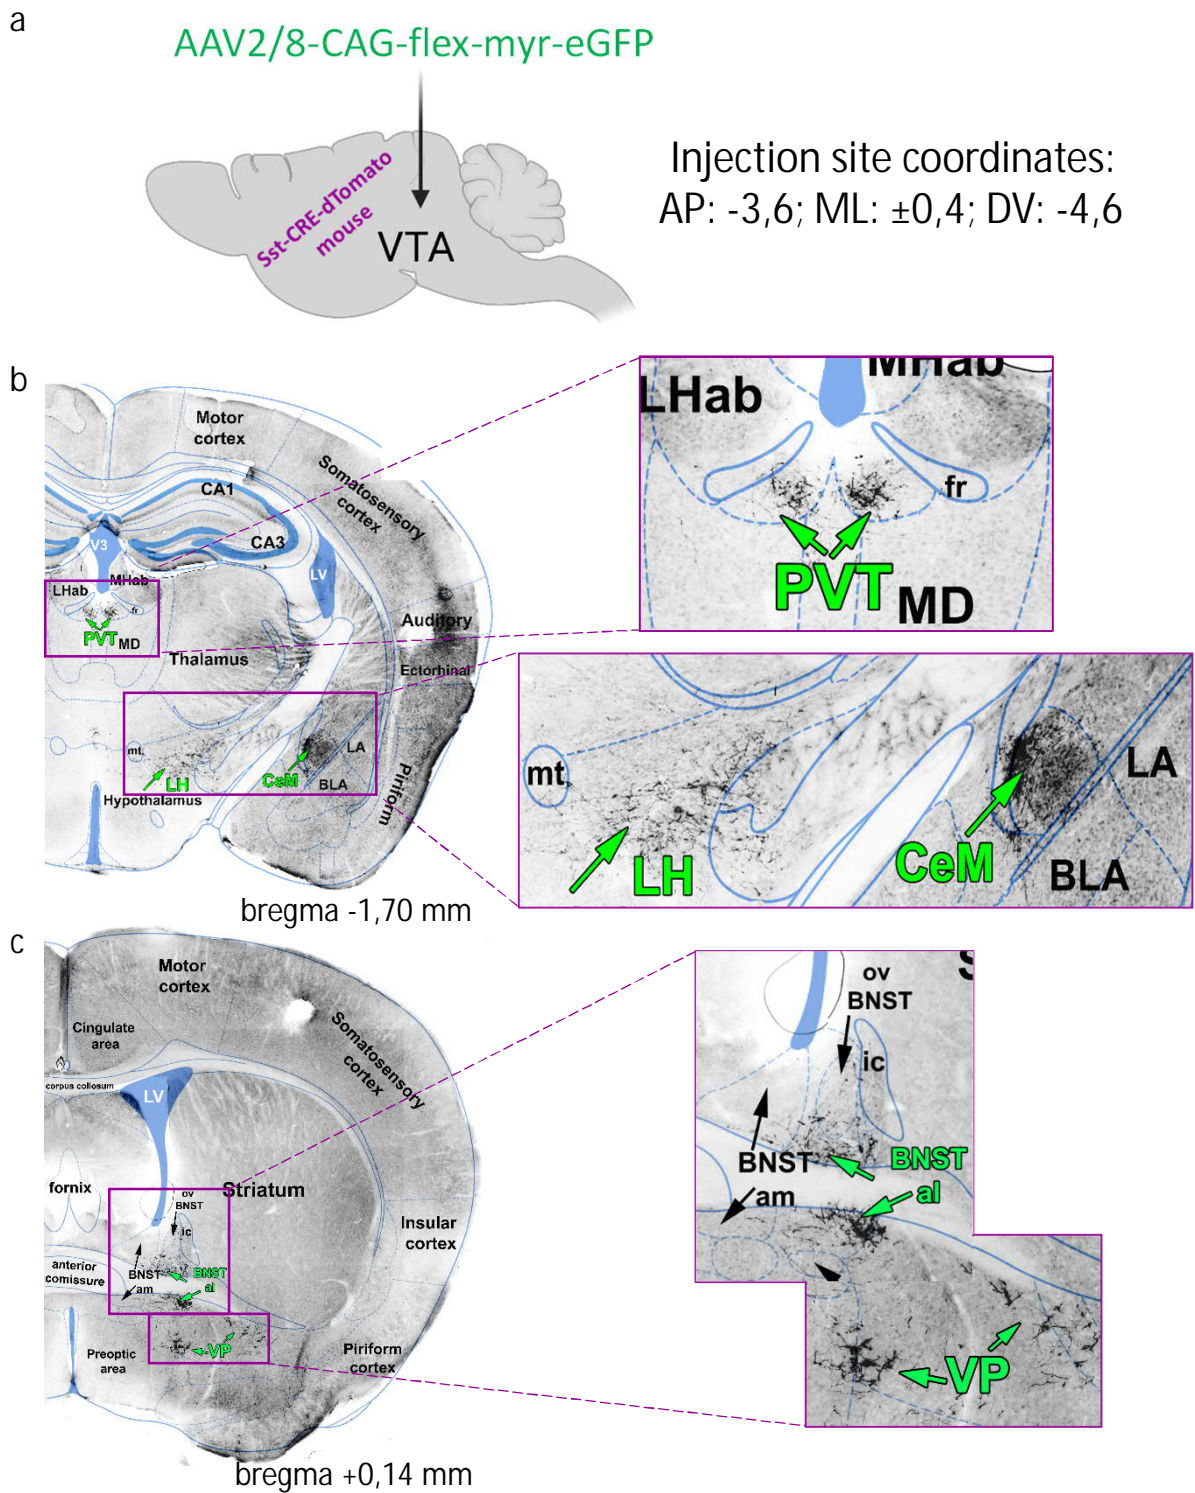

Figure 2. Anterograde tracing of the VTA Sst neurons. a. Sst-tdTomato mice received a unilateral intra-VTA injection of a Cre-dependent AAV tracer. The scheme shows the name of the viral tracer and injection coordinates. b. Examples of the VTA Sst+ projections found in the PVT, LH and CeM at the bregma level -1.70 mm. c. Examples of the VTA Sst+ projections found in the aBNST and VP at the bregma level +0.14 mm. b-c images are the black and white variants of the fluorescent GFP+ images of the coronal mouse brain sections.



99 anatomy of the PVT, which is the member of the midline thalamic nuclei family  
100 (Kirouac, 2015).

101 The majority of VTA Sst projecting neurons have electrophysiological ADP subtype  
102 and express *Th* and *Vglut2*

103 Retrograde tracing experiments also showed the location specificity of the VTA  
104 Sst projecting neurons in the VTA. Most (64/88 analyzed) of the backtraced neurons  
105 were found in the anterolateral part of the VTA at the bregma levels between -2.9  
106 and -3.3 mm, with more than half of the cells found at the bregma levels -3.08 and -  
107 3.16 mm (Fig. 3c, 4b). We previously demonstrated that different electrophysiological  
108 subtypes of the VTA Sst neurons have distinct locations, assigning anterolateral VTA  
109 neurons to either afterdepolarizing (ADP) or high-frequency firing (HFF) subtypes  
110 (Nagaeva et al., 2020). Therefore, we took an effort to define the electrophysiological  
111 subtype of the projecting neurons. To do that, we repeated the same procedure that  
112 was used for the backtracing experiments and performed patch-clamp recordings on  
113 GFP-positive VTA neurons. We also took advantage of the patch-clamp method to be  
114 combined with single-cell mRNA extraction (Cadwell et al., 2017; Fuzik et al., 2016;  
115 Sucher and Deitcher, 1995) and used the collected cell contents for further PCR  
116 analysis of the expression of main neurotransmitter markers.

117 For the classification of electrophysiological subtypes of projecting Sst cells, we  
118 applied automatic firing pattern analysis (Nagaeva et al., 2021) and clustering  
119 algorithm (Nagaeva et al., 2020). We used our previously published  
120 electrophysiological dataset containing the firing patterns of 389 VTA Sst neurons as  
121 the reference dataset in the clustering procedure (for the full description of the  
122 method and reference dataset, see Nagaeva et al., 2020). The majority (67%) of the  
123 backtraced neurons were assigned to the ADP cluster (Fig. S5b). Indeed, these  
124 neurons showed adapting firing rates at the saturated level of excitation, sag

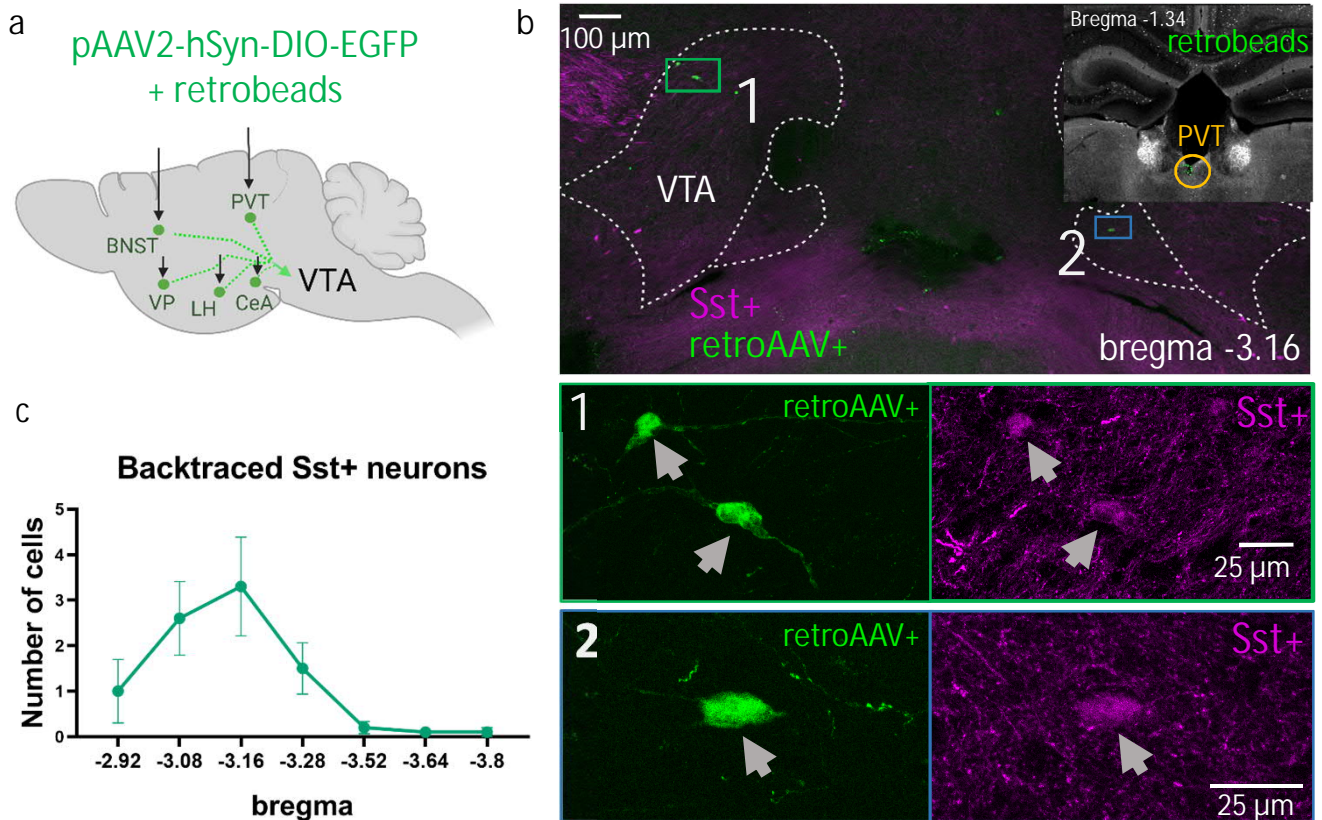

Figure 3. Retrograde tracing of the VTA projecting Sst neurons. a. Sst-tdTomato mice each received a unilateral injection of the mixture of the Cre-dependent retro-AAV virus and retrobeads in one of the five found VTA Sst projection targets (Fig.2). b. Examples of the backtraced neurons in the VTA at the bregma level -3.16 mm. The right upper corner shows retrobeads (green dots) in the injection site within the PVT (yellow circle). The green rectangle shows ipsilaterally traced neurons (1) and the blue rectangle shows a contralaterally traced neuron (2). Lower panels 1 and 2 are the magnified images of the green and blue rectangles. c. The graph shows the distribution of the backtraced VTA neurons at different bregma levels. The number of the backtraced Sst+ neurons from 5 different targets (LH, CeM, PVT, BNST and VP) were combined and are shown as average  $\pm$  S.E.M. (n=10 mice).



125 depolarization and small afterdepolarization in the first rheobase action potential  
126 (Fig. 4a), mimicking the ADP Sst subtype. Antero-lateral location of the recorded  
127 neurons (Fig. 4b) also supported their affiliation with the ADP subtype.

128 qPCR analysis of the recorded Sst neurons suggested that 78% (18/23 analyzed)  
129 of the neurons expressed tyrosine hydroxylase (*Th*) mRNA and 72% (16/23 analyzed)  
130 *Vglut2* mRNA with 13/23 cells having both *Th* and *Vglut2* transcripts (Fig. 4c). To  
131 address the question of the possible contamination and to have a positive control for  
132 the DAergic nature, we also analyzed four DA neurons from the VTA of Th-EGFP mice  
133 using the same procedure (DA1-DA4 in the Fig. 4c). These control DA cells expressed  
134 a combination of all classical dopaminergic markers, including *Th*, DOPA  
135 decarboxylase (*Ddc*) and dopamine reuptake transporter (*Dat*). None of the  
136 backtraced VTA Sst+ neurons was found to express the same full set of DA markers  
137 (Fig. 4c). Importantly, the control DA neurons did not express any other tested genes,  
138 suggesting a low level of contamination from surrounding cells during the cell  
139 collecting procedure. Interestingly, we were able to detect *Sst* mRNA in very few of  
140 the recorded neurons, although in our mouse model, GFP could be expressed in these  
141 neurons only via a Cre-dependent mechanism under the *Sst* promotor. This fact might  
142 be explained by the low level of *Sst* mRNA expression in *Sst*-Cre homozygous mice  
143 (Viollet et al., 2017). Only 2 out of 23 analyzed *Sst* projecting neurons showed  
144 expression of a combination of the two major GABAergic markers *Vgat* and *Gad1*. We  
145 did not observe any specificity in expression profiles depending on the projection  
146 target.

147 Behavioural consequences of the deletion of VTA Sst neurons

148 We used “the loss of function” approach to elucidate the behavioural impact  
149 of the VTA Sst neurons and selectively deleted them by injecting a Cre-dependent  
150 caspase-expressing virus bilaterally into the VTA area of adult *Sst*-Cre-tdTomato

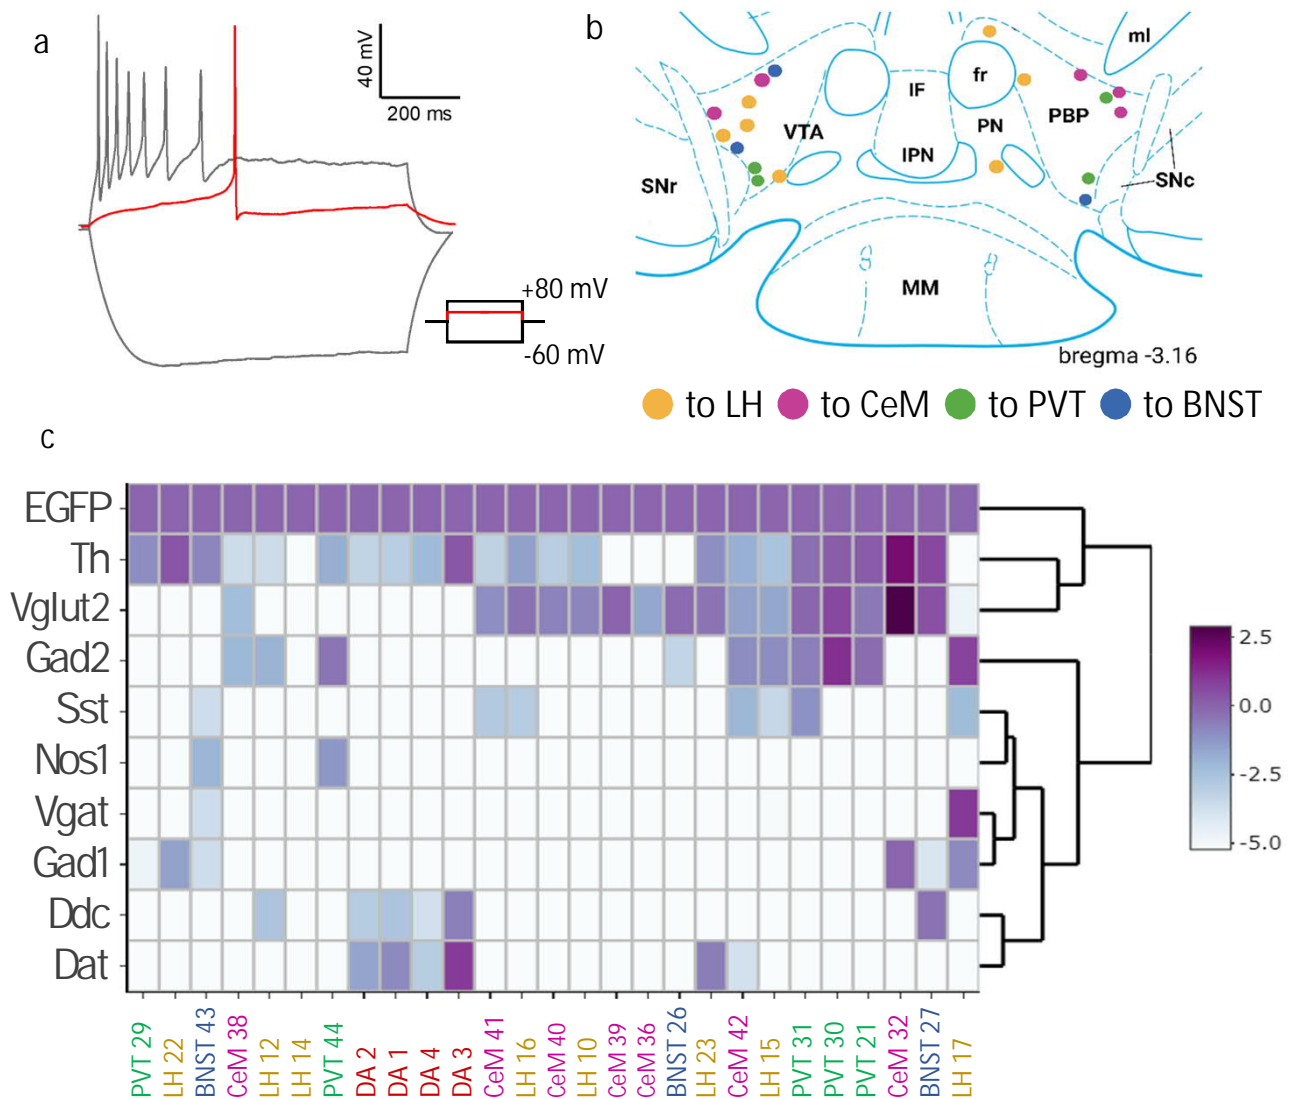

Figure 4. Electrophysiological and expression profiles of the VTA neurons projecting to the forebrain. **a**. A representative trace of the response of a VTA Sst projecting neuron to injected 800-ms current steps of -60, +8 (red line) and +80 mV. Adapting firing pattern at -80 mV and no delay before the firing resemble features of the ADP Sst subtype (see Nagaeva et al., 2020). **b**. Locations of the recorded VTA Sst neurons at the bregma level -3.16 mm. Their projection sites are colour-coded. **c**. The heatmap shows single-cell qPCR results for the main neurotransmitter markers of the backtraced VTA neurons. *EGFP* expression was used as a reference gene and has an expression value of 1. The majority of VTA Sst projecting neurons show expression of *Th* or *Vglut2*, or both, and lack of *Vgat* and *Dat*. Hierarchical clustering analysis did not indicate any neurotransmitter specificity depending on the projecting target. Cell names and colour codes on the X-axis represent the projection site of the cells. DA 1-4 are “control” dopamine cells from Th-EGFP mice and showed detectable expression levels of *Th*, *Dat* and *EGFP*.

151 mice. After activation, this virus started the programmed cell death and eliminated  
152 Sst neurons exclusively in the injected region (Yu et al., 2019), resulting in “VTA<sup>Sst-</sup>  
153 mice”. To visualize successful deletion, the GFP-expressing Cre-dependent virus was  
154 injected either together with the caspase virus or alone into the control group (Fig.  
155 S6). We aimed to delete neurons preferably in the anterolateral VTA, where most of  
156 the projecting Sst neurons were found (see Fig. 3c).

157 For the proper planning of the behavioural experiments, we considered the  
158 previously established interneuronal function of ADP Sst neurons (Nagaeva et al.,  
159 2020) and the physiological function of their projection targets. Since, on one hand,  
160 VTA Sst ADP neurons can inhibit locally neighbouring DA neurons, we used several  
161 reward and motivation-related tasks to find out how the impairment of the local  
162 inhibitory circuitry affects these processes (Corre et al., 2018; Van Zessen et al.,  
163 2012). On the other hand, since they project to forebrain targets such as the PVT,  
164 CeM, LH, VP and BNST implicated in the processing of the aversive stimuli and  
165 defensive behaviours (Gao et al., 2020; Gomes-de-Souza et al., 2021; Keifer et al.,  
166 2015; Lebow and Chen, 2016), we used stress-, anxiety- and fear-related  
167 behavioural tests. It was also important to find out whether there were any sex  
168 differences in the affected behaviours, as some of the VTA Sst projection targets,  
169 such as the PVT, BNST and LH, are known to be sexually dimorphic structures (Kim et  
170 al., 2017; López-Ferreras et al., 2017; Uchida et al., 2019).

171 Increase in home-cage activity of VTA<sup>Sst-</sup> female mice

172 Table 1 contains information of the behavioural experiments, the numbers of  
173 animals tested in the control and VTA<sup>Sst-</sup> groups, and whether or not we found  
174 statistically significant changes in behaviour. Of the 18 tests performed, only 5  
175 showed noticeable differences between the VTA<sup>Sst-</sup> and control groups. Interestingly,  
176 half of the differences were sex-specific. The VTA<sup>Sst-</sup> females were more active in

Behavioural tests for VTA<sup>Sst+</sup> and VTA<sup>Sst-</sup> mice

Table 1

| Name of the test                          | Environment | group size |           |           |           | Affected? | Statistical significance in                                                                                                        |
|-------------------------------------------|-------------|------------|-----------|-----------|-----------|-----------|------------------------------------------------------------------------------------------------------------------------------------|
|                                           |             | ♂ control  | ♂ caspase | ♀ control | ♀ caspase |           |                                                                                                                                    |
| Running wheel                             | home cage   | 9          | 6         | 8         | 5         | No        | -                                                                                                                                  |
| Open field                                | open arena  | 10         | 9         | 11        | 8         | No        | -                                                                                                                                  |
| Light-dark box                            | test system | 10         | 9         | 11        | 8         | No        | -                                                                                                                                  |
| Elevated plus maze                        | test system | 10         | 9         | 11        | 8         | No        | -                                                                                                                                  |
| Novely suppressed feeding                 | open arena  | 10         | 9         | 11        | 8         | No*       | tendency to sex-treatment interaction; caspase males start eating faster than controls, and caspase females later than controls    |
| Sucrose preference                        | home cage   | 10         | 9         | 11        | 7         | No        |                                                                                                                                    |
| Morphine-induced locomotor sensitization  | open arena  | 10         | 7         | 11        | 8         | Yes       | expression of morphine sensitization, caspase mice display stronger morphine-induced locomotor sensitization                       |
| Forced swim test                          | test system | 10         | 9         | 11        | 8         | Yes       | caspase animals struggle longer than controls                                                                                      |
| Saccharine preference                     | Intellicage | 7          | 7         | 7         | 5         | No        |                                                                                                                                    |
| Home cage activity in group               | Intellicage | 7          | 7         | 7         | 5         | Yes       | females are more active in nose-poking to water-containing doors than males; caspase females are more active than control females. |
| Delay discounting                         | Intellicage | 7          | 7         | 7         | 5         | No*       | Strong sex interaction; females are ready to wait longer for the saccharine than males.                                            |
| Reward-related learning                   | Intellicage | 7          | 7         | 7         | 5         | No        | -                                                                                                                                  |
| Reward-related unlearning                 | Intellicage | 7          | 7         | 7         | 5         | No        | -                                                                                                                                  |
| Reward-related unlearning with punishment | Intellicage | 7          | 7         | 7         | 5         | No        | -                                                                                                                                  |
| Reward-related re-learning                | Intellicage | 7          | 7         | 7         | 5         | No        | -                                                                                                                                  |
| Fear conditioning (FC)                    | test system | 6          | 7         | 5         | 5         | Yes       | sex-treatment interaction; caspase males freeze less and caspase females freeze more than controls                                 |
| FC context test                           | test system | 6          | 7         | 5         | 5         | Yes       | sex-treatment interaction; caspase males freeze less and caspase females freeze more than controls                                 |
| FC cue test                               | test system | 6          | 7         | 5         | 5         | No        | -                                                                                                                                  |

177 nose-poking to the water-containing doors in the corners during the first 14 h in the  
178 Intellicage environment than the control females (Fig. 5a). Their activity remained  
179 upregulated after adaptation to the Intellicage (during 39-62 h after start),  
180 suggesting that differences were not due to exploration of the novel environment. It  
181 is important to note that the number of licks to water bottle tips behind the doors  
182 was similar in all mouse groups, indicating no increase in water consumption in the  
183 VTA<sup>Sst</sup>- females, or in the females overall compared to males (data not shown).  
184 Similarly, we did not see any differences in the open-field and anxiety tests between  
185 the control and VTA<sup>Sst</sup>- mice (Fig. S8, Table S3), suggesting that deletion of the VTA  
186 Sst neurons influenced exclusively the home-cage activity in females and not the  
187 explorative activity or the level of anxiety. There were no changes in these tests  
188 between the control and VTA<sup>Sst</sup>- male mice (Fig. 5b, Fig. S8).

189 Fear conditioning is affected differently in VTA<sup>Sst</sup>- males and females

190           Considering that VTA Sst neurons mostly project to the brain areas which  
191 control response and memory formation to aversive events (Concetti et al., 2020;  
192 Goode and Maren, 2017; Keifer et al., 2015; Penzo et al., 2015), we further assessed  
193 possible changes in threat processing. We used a Pavlovian fear conditioning  
194 paradigm (Maren, 2001), followed by contextual and cue-induced retrieval tests to  
195 assess differences in acquisition (acute response) and fear memory  
196 formation/expression. During the acquisition, mice were presented with three  
197 consecutive 30-s cue sounds (CS) co-terminated with 2-s foot shocks (0.6 mA) and  
198 separated with short breaks (Fig. 6a). Repeated measures two-way analysis of  
199 variance (ANOVA) for the percent freezing and number of the freezing episodes  
200 detected a significant sex\*treatment interaction (Table S2, p=0.004 and p=0.035,  
201 respectively), indicating that the deletion of VTA Sst neurons influenced reaction to  
202 the aversive foot-shock stimuli in a sex-dependent manner. Deeper analysis of the  
203 data showed that this difference came exclusively from the time points between the



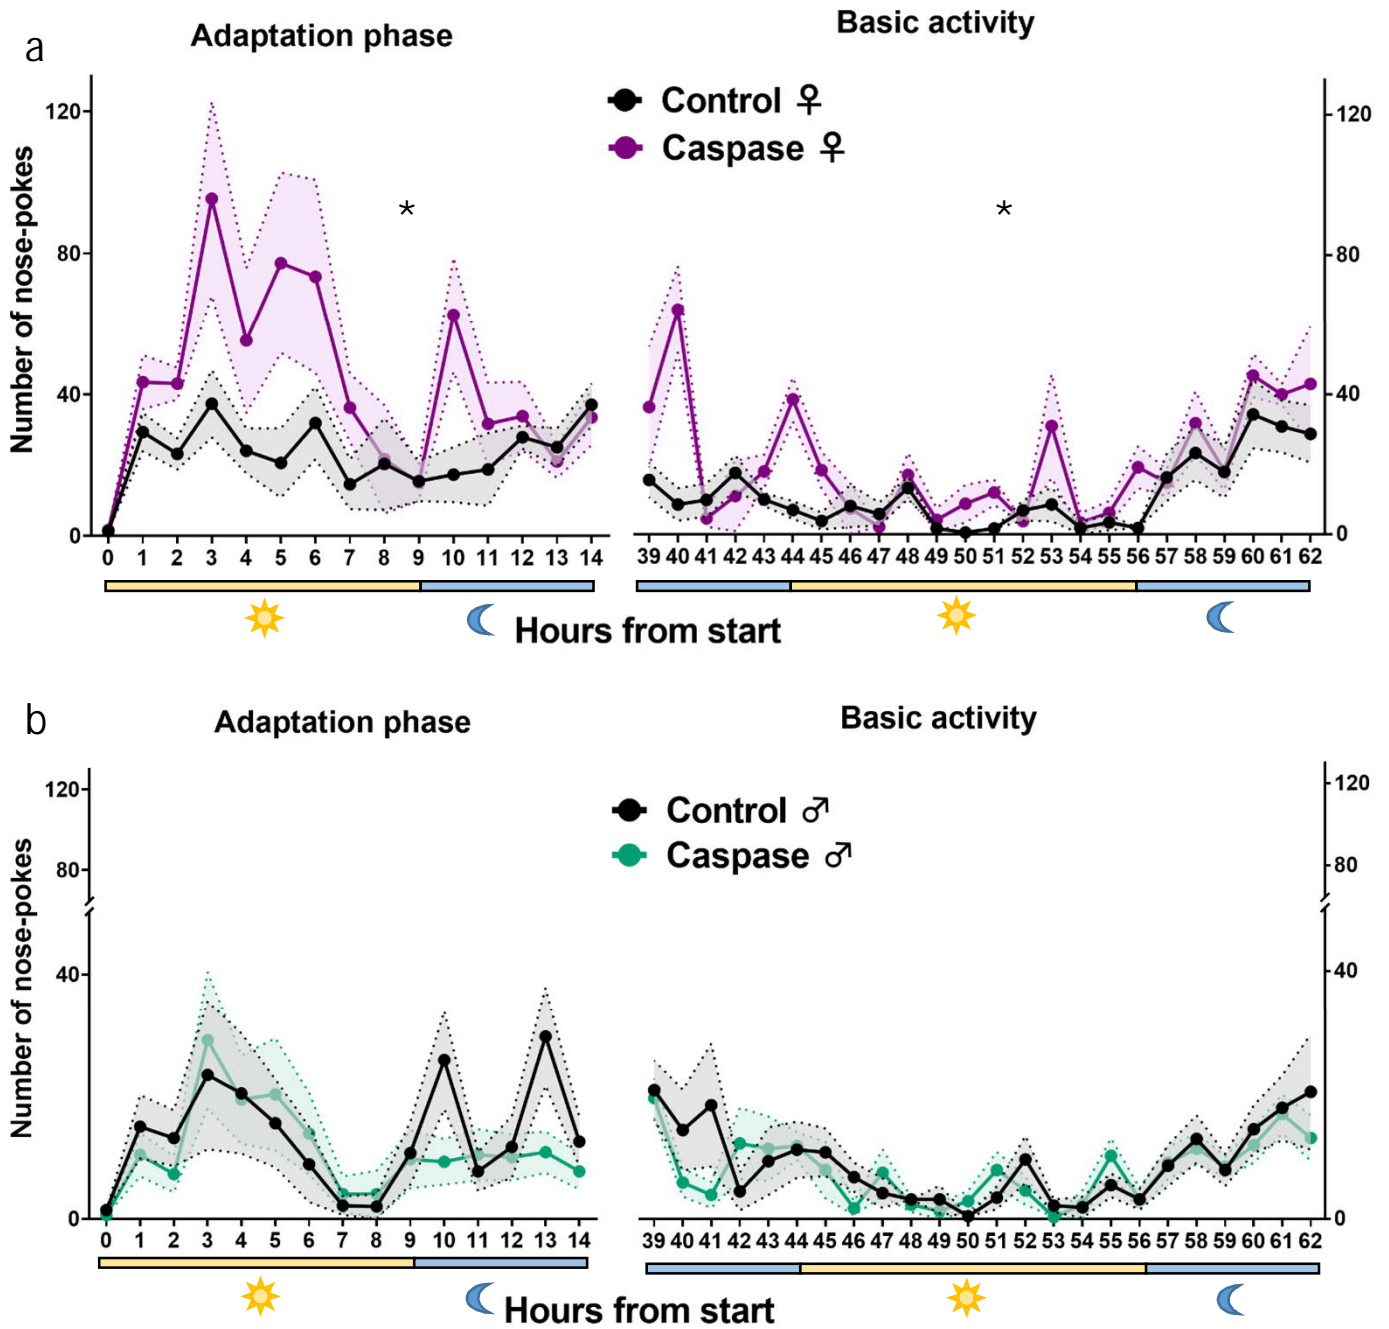

Figure 5. VTA<sup>Sst</sup>-caspase female mice demonstrated an increased number of nose-pokes in the Intellicage system. Y-axis indicates the number of nose-pokes into the water-containing doors per h, X-axis shows the time after the beginning of the test. Yellow and blue bars beneath the graphs show light and dark phases, respectively. a. VTA<sup>Sst</sup>-caspase females nose-poked more often in the Intellicage environment than the control females, suggesting higher activity during the adaptation (sex x treatment:  $F(1,22) = 7.085$ ,  $p=0.014$ ; ♀ *post-hoc*  $p=0.004$ ) and after habituation to the new environment (sex x treatment:  $F(1,22) = 8.043$ ,  $p=0.010$ ; ♀ *post-hoc*  $p=0.002$ ). Females were overall more active than males (sex:  $F(1,22) = 27.329$ ,  $p<0.001$ ). b. There was no difference between the male treatment groups. \*  $p < 0.05$  for the significance of the difference in overall activities (post-hoc test).

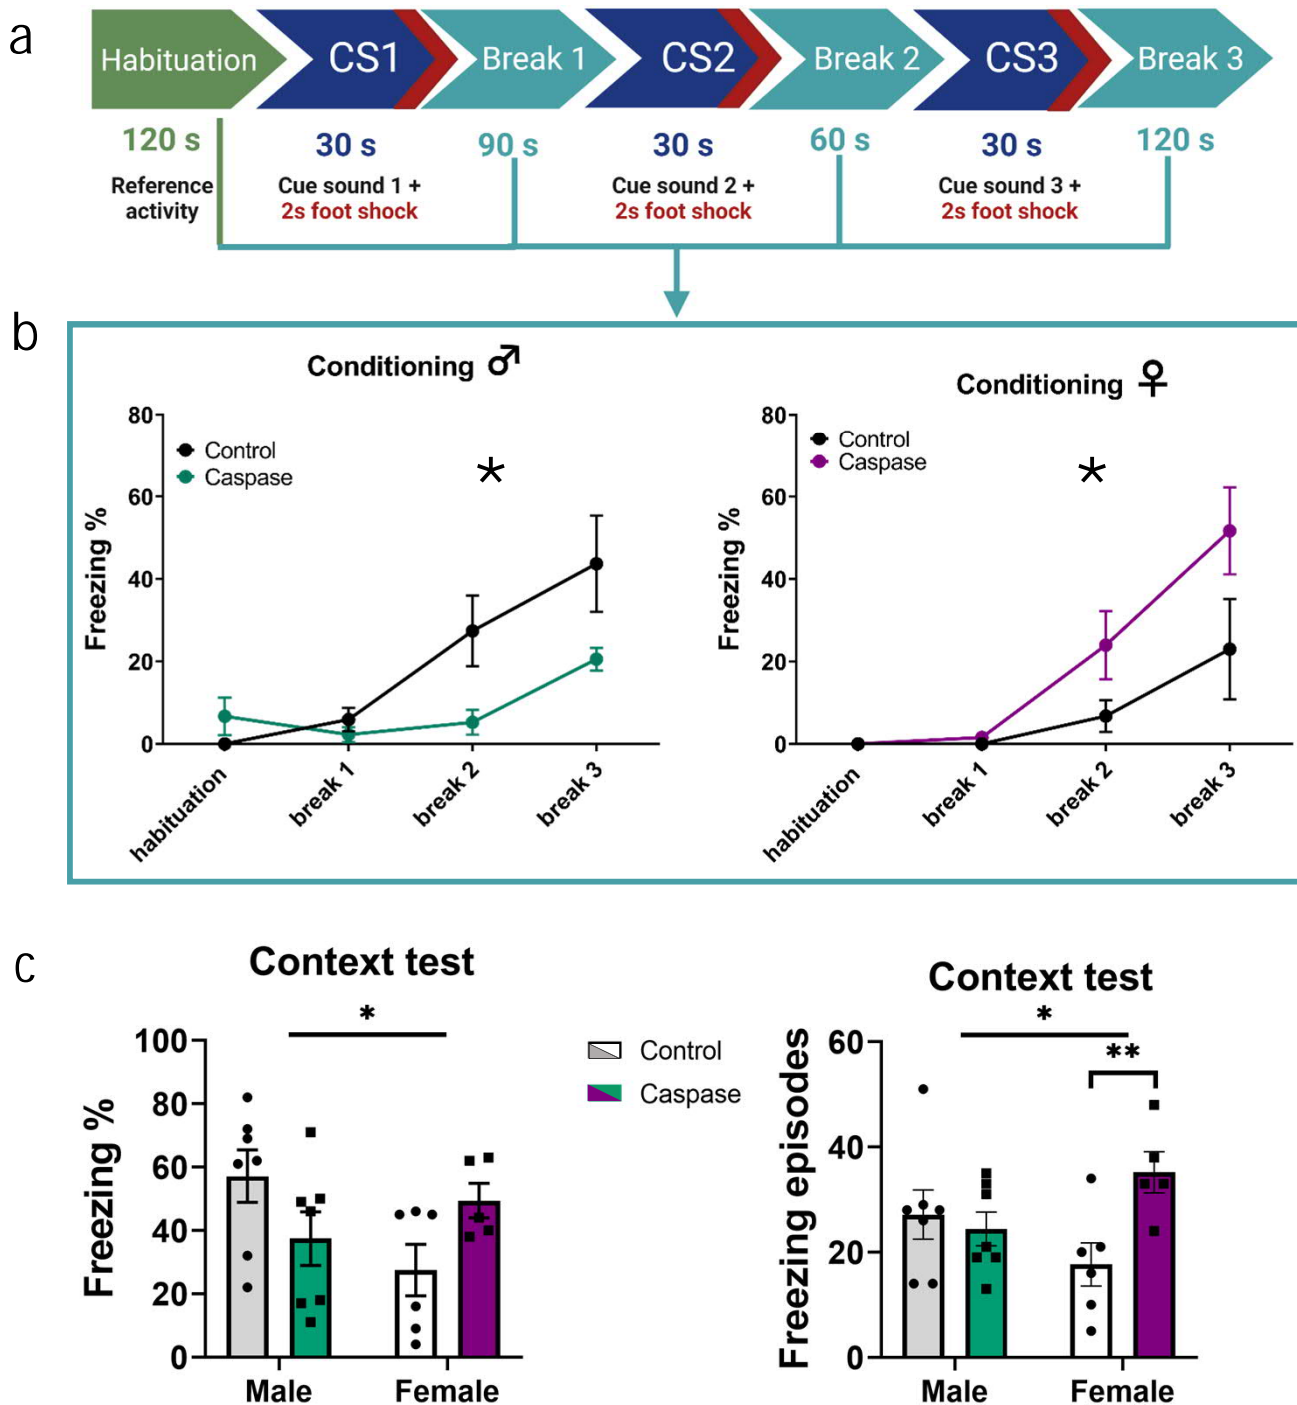

Figure 6. Deletion of VTA Sst neurons affected fear conditioning in a sex-dependent manner. a. Fear conditioning protocol during the acquisition phase (see methods). b. Graphs show per cent freezing (freeze time/total time) during breaks following the conditioning episodes (sex x treatment:  $F(1,21)= 9.971$ ,  $p=0.005$ ). The VTA<sup>Sst</sup>-caspase males froze less during the breaks between foot shocks, whereas the VTA<sup>Sst</sup>-caspase females, on contrary, froze more (*post hoc* males  $p=0.036$ , females  $p=0.038$ ). c. A similar sex x treatment interaction ( $F(1,21)= 6.602$ ,  $p=0.018$  for freezing %;  $F(1,21)= 6.102$ ,  $p=0.022$  for freezing episodes) was observed in the context-associated fear memory retrieval test 9 days after the conditioning. The right graph shows that the VTA<sup>Sst</sup>-caspase females froze more often, but, as seen in the left graph, not significantly longer (freezing %) than the control females (freezing episodes *post hoc* females  $p=0.01$ ). Data are shown as mean  $\pm$  SEM. \* $p < 0.05$ , \*\* $p < 0.01$ .

204 foot shocks when the sound was absent (breaks 1, 2 and 3; Fig. 6, S9b). Indeed, *post*  
205 *hoc* analysis confirmed that the VTA<sup>Sst-</sup> males froze less than the control males  
206 ( $p=0.036$ ) during the breaks between foot shocks, whereas the VTA<sup>Sst-</sup> females froze  
207 more than the control females ( $p=0.038$ ) (Fig. 6b). Interestingly, there were no  
208 differences between the VTA<sup>Sst+</sup> and VTA<sup>Sst-</sup> groups when the cue sound was on (Fig.  
209 S9b).

210 Further, we tested context-induced fear memory retrieval by placing the mice  
211 for 5 min in the same chamber, where they had received foot shocks 9 days earlier.  
212 Again, there was a similar sex\*treatment interaction ( $p=0.018$ ) in the percent  
213 freezing and freezing episodes ( $p=0.022$ ; Fig. 6c) as we saw during the conditioning.  
214 Although *post hoc* tests did not show significant differences in the percent freezing  
215 between the treatment groups within sexes, the VTA<sup>Sst-</sup> females showed more  
216 freezing episodes ( $p=0.01$ ), meaning they froze more often but not significantly  
217 longer than the control females (Fig. 6c). Cue-induced retrieval or extinction after  
218 repeated cue presentations were not significantly affected by the deletion of the  
219 VTA Sst neurons, although the results showed similar sex-dependent trends as  
220 during the conditioning and context testing (Fig. S9c).

221 Deletion of VTA Sst neurons delays the onset of immobility in the forced-swim test

222 One of the non-sex-dependent changes in the behavioural performance of the  
223 mice lacking VTA Sst neurons was a delayed latency to the first immobility event in  
224 the forced-swim test (FST) (Fig. 7). Results showed that the VTA<sup>Sst-</sup> mice struggled  
225 longer than the control group ( $p=0.031$ ) and tended to spend less time immobile  
226 during the first 4 min of the test. As the tested animals were not exposed to any  
227 chronic stressor before the FST, the observed behavioural alteration might  
228 predominantly be related to a reaction to the acute unpredictable stressor.

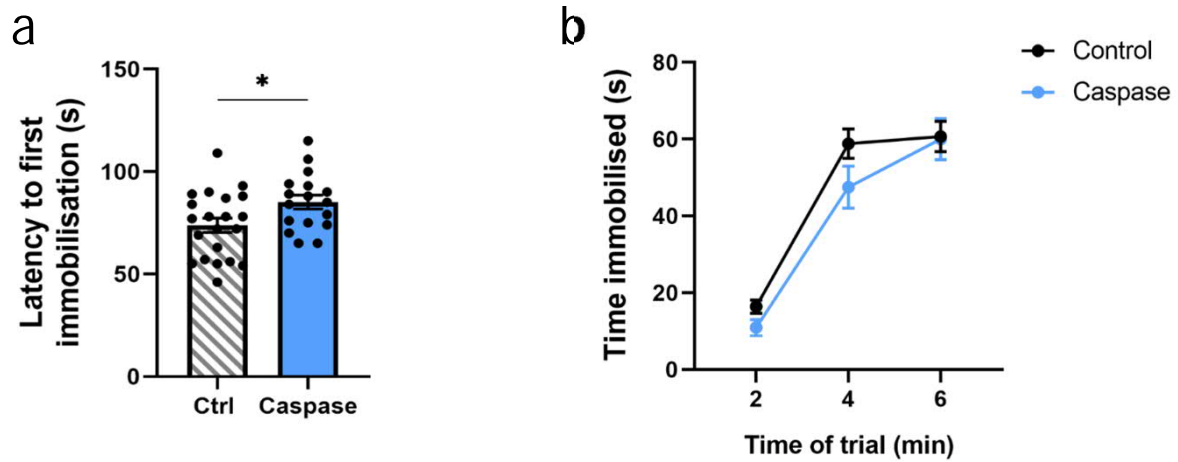

Figure 7. Delayed onset of immobility in the forced swim test in the VTA<sup>Sst</sup>-caspase mice. a. VTA<sup>Sst</sup>-caspase mice showed a longer latency to the first immobilisation event ( $F(1,34) = 5.08$ ,  $p = 0.031$ ), b. and a tendency for a shortened duration of immobilization (time x treatment:  $F(2,68) = 1.938$ ,  $p = 0.16$ ) especially in the first four min. Data are shown as mean  $\pm$  SEM, and dots in panel a show individual data points. \* $p < 0.05$ .

229 Deletion of VTA Sst neurons affected morphine sensitization, but not natural  
230 reward-related processing

231 Taking into account the previously shown ability of VTA Sst neurons to inhibit  
232 neighbouring DA cells (Nagaeva et al., 2020), it was important to find out whether  
233 drug and natural reward processing would be affected in VTA<sup>Sst-</sup> animals. We chose  
234 morphine as the experimental substance since its rewarding potential is well known  
235 in rodents (Kuzmin et al., 1996; Martin et al., 1963) and its mechanism of action  
236 includes inhibition of VTA GABA cells resulting in excessive DA neuron firing by  
237 disinhibition (Johnson and North, 1992). There were no differences in the locomotor  
238 response to a single-dose morphine administration (20 mg/kg, i.p.) between the  
239 treatment groups (Fig. 8a), indicating that acute reaction to morphine was not  
240 affected in VTA<sup>Sst-</sup> mice. However, we detected a significant enhancement in  
241 sensitization to locomotor activation by the second morphine challenge in the  
242 VTA<sup>Sst-</sup> mice as compared to the control mice, 7 days after the first morphine  
243 injection (Fig. 8b).

244 As the natural reward to be tested, we chose sweetened drinking water but  
245 did not find any significant differences between the treatment groups in sucrose or  
246 saccharine consumption or preference over plain water (Fig. S10). We also designed  
247 two reward-based learning tasks for the Intellicage system aiming to assess  
248 alterations in prediction error processing (Schultz et al., 1997) and in punishment-  
249 resistant reward preference. For these tasks, the mice learned first to nose-poke in  
250 assigned corners to receive access to 0.3% saccharine in water. Each nose-poke to  
251 the saccharine door activated light informing that the saccharine will be available in  
252 2 s. On the third day, when the task performance was stable, we either emptied the  
253 saccharine bottles or introduced 0.2-bar air puffs with a 25% probability at the end  
254 of the licking session (Radwanska and Kaczmarek, 2012). It is important to note that



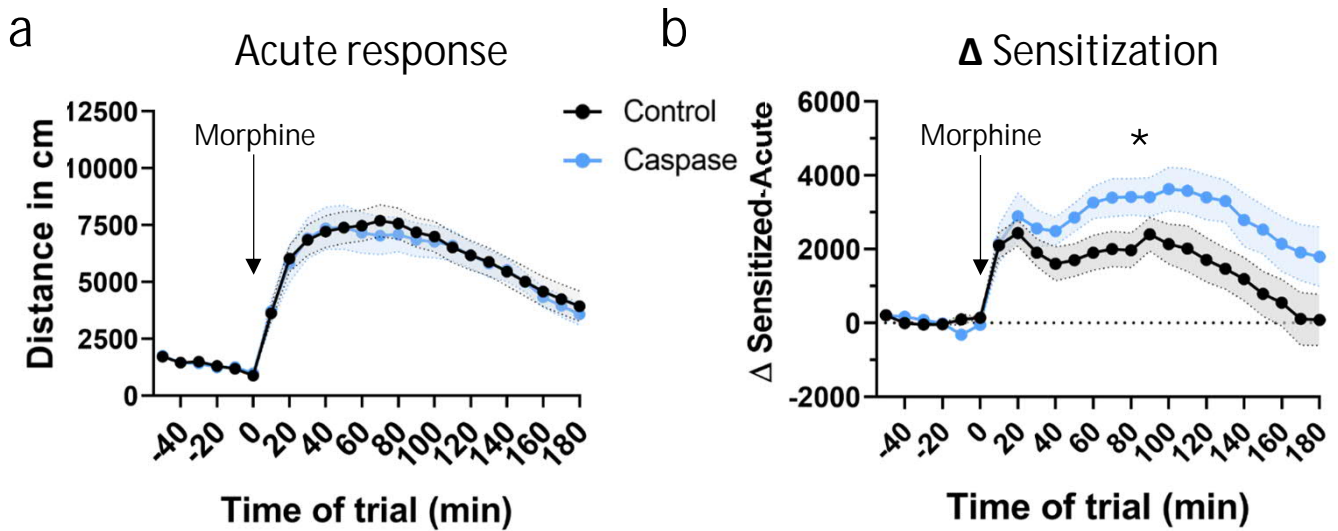

Figure 8. Increased morphine-induced locomotor sensitization in  $VTA^{Sst-}$  mice. Arrows indicate the time of morphine administration (20 mg/kg, i.p.) a. Acute treatment with morphine-induced similar hyperlocomotor response in both treatment groups (treatment:  $F(1,32) = 0.034$ ,  $p = 0.854$ ) b. Seven days after the first morphine injection, the response to the morphine challenge was enhanced and prolonged in the  $VTA^{Sst-}$  caspase mice as compared to controls [Treatment:  $F(1,32) = 12.014$ ,  $p = 0.002$ ; Time x treatment:  $F(23,735) = 2.915$ ,  $p = 0.024$ ]. Data are shown across 10 min time bins as means  $\pm$  SEM. \* $p < 0.05$ .

255 the two experimental tasks took place consecutively in the Intellicage allowing  
256 assessment of the re-learning rates after failed reward accesses.

257 The “prediction error” probing showed significant sex differences ( $p < 0.001$ )  
258 and sex\*treatment interaction ( $p = 0.043$ ) between the VTA<sup>Sst+</sup> and VTA<sup>Sst-</sup> groups  
259 (data not shown). However, further *post hoc* analysis separately for males and  
260 females did not show any significant differences between the treatments, but  
261 showed a tendency for the VTA<sup>Sst-</sup> females to re-learn slower not to nose-poke  
262 anymore in an emptied saccharine bottle ( $p = 0.064$ ). For the next “punishment-  
263 resistant reward preference test”, saccharine was re-introduced in new corners  
264 after being unavailable for 2 days and the mice had to re-learn the rules. Although  
265 there was a tendency of the VTA<sup>Sst-</sup> male mice to be less active in nose-poking to  
266 saccharine corners in all phases of the re-learning/avoidance test (Fig. S11), we  
267 could not detect any statistically significant differences between the groups (see  
268 Table S1). Similarly, we did not detect any differences in reactions to air-puffs.  
269 Delay discounting test revealed a sex-dependent, but not VTA Sst neuron-  
270 dependent difference

271 Even though we did not find any differences in the preference for saccharine or  
272 sucrose of various concentrations between the VTA<sup>Sst-</sup> and control groups (Fig. S10),  
273 we observed an interesting sex-dependent behaviour in the delay discounting (DD)  
274 task (Mitchell, 2014) in Intellicage system. The delay discounting test, where mice  
275 learn to wait for a reward for increasing periods of time, showed a sex difference  
276 ( $p = 0.0239$ ) with significant dependence on the duration of the delay (sex\*delay  
277 interaction  $p < 0.001$ ; Table S1). As shown in Fig. S12, for both male groups the longer  
278 delay to the saccharine delivery drastically decreased the number of licks to the  
279 saccharine bottle starting from a 4-s delay and dropped almost to nonexistent at a  
280 5-s delay, while females were still willing to wait and lick. The delay-discounting test

281 is usually interpreted as a measure of impulsivity, making male mice in our  
282 experiment more impulsive or less patient. However, we did not see any differences  
283 between the treatment groups within the sexes, suggesting that the deletion of the  
284 VTA Sst neurons did not affect impulsivity or readiness to wait for the reward.

## 285 Discussion

286 In the present study, we demonstrated that Sst neurons similarly to other  
287 neurons in the VTA can project outside the midbrain. In addition to their local  
288 inhibitory activity onto neighbouring DA cells (Nagaeva et al., 2020), VTA Sst  
289 neurons consistently project to at least five forebrain targets: aBNST, CeM, PVT, LH  
290 and VP. These projecting Sst neurons have a specific location in the anterolateral  
291 part of the VTA and they predominantly can express *Vglut2* or *Th*, or both of them.  
292 The existence of double positive *Th*<sup>+</sup>/*Vglut2*<sup>+</sup> neurons is well established in the VTA  
293 of mice and rats by several studies (Li et al., 2013; Yamaguchi et al., 2015), reporting  
294 also that about 50% of these neurons lack mRNAs for the main DA markers  
295 (confirmed by our qPCR results). Some of these *Th*<sup>+</sup>/*Vglut2*<sup>+</sup> neurons also fail to  
296 express detectable *Th* protein levels, and the majority of them were located in the  
297 medial VTA. However, we found here that *Sst*<sup>+</sup>/*Th*<sup>+</sup>/*Vglut2*<sup>+</sup> projecting neurons  
298 were predominantly located in the anterolateral VTA, suggesting that they might  
299 represent a sizable proportion of the *Vglut2*<sup>+</sup>/*Th*-IR (immunoreactive) population  
300 described by Yamaguchi et al. (Yamaguchi et al., 2011), but still lack the possibility to  
301 produce and reuptake dopamine due to absence of *Ddc* and *Dat* expression.

302 Innervation pattern of the forebrain targets by the VTA Sst neurons resembles  
303 that found in *Gad2-Cre* mice, and to lesser extent that reported for the VTA *Gad1*<sup>+</sup>  
304 efferents (Taylor et al., 2014). Moreover, in that study the expression patterns of *Th*  
305 and *Vglut2* in the VTA neurons projecting to the BNST, CeA, and VP were also quite  
306 similar to the patterns found in our study for VTA Sst neurons. However, projection

307 repertoire of the *Gad2*<sup>+</sup> VTA neurons was much wider than that of the VTA Sst  
308 neurons found by us, suggesting that the Sst promoter targets a more restricted  
309 population of the projecting neurons.

310 Taking into account mixed neurotransmitter nature of the VTA Sst neurons and  
311 the fact that *Sst* and *Gad2* can be expressed also in excitatory neurons (Phillips et al.,  
312 2022; Quina et al., 2020), it is logical to suggest that at least some of the targets  
313 found belong to the known VTA Glu neuron projections. For instance, some of the  
314 VTA *Vglut2*<sup>+</sup> neurons have been shown to activate and inhibit VP neurons with the  
315 excitatory action to be more pronounced (Hnasko et al., 2012; Yoo et al., 2016). It is  
316 possible that the Sst projections described here represent a part of these Glu  
317 projections, as most of the VTA Sst projecting neurons in our experiments (72%)  
318 expressed *Vglut2*. However, physiological confirmation of the ability of the VTA Sst  
319 neurons to excite cells in their projection targets, e.g., using optogenetics, is needed  
320 for the conclusion about their Glu nature.

321 Similarly, optogenetic activation of the VTA neurons in *Gad2*-Cre mouse line  
322 showed functional inhibitory connection of these neurons with neurons in the CeM  
323 (Zhou et al., 2019), suggesting that the VTA Sst<sup>+</sup> projections might constitute at least  
324 a part of the described VTA-CeM pathway. In the mentioned work, authors did not  
325 check out whether this pathway can also evoke excitatory postsynaptic currents,  
326 which it might be able to do as the VTA Sst-CeM neurons predominantly expressed  
327 *Vglut2* and *Gad2*, but not *Gad1* or *Vgat* (Fig. 4c). This remains to be confirmed in  
328 further research. Projections of the VTA GABA and Glu neurons to the LH has been  
329 shown to regulate wakefulness and sleeping behaviour (Yu et al., 2019). Taking into  
330 account that the Sst neurons projecting to the LH expressed *Vglut2* and sometimes  
331 *Gad1/Vgat*, it is plausible that in the work of Yu et al. a sizable population of the Sst  
332 neurons described here was responsible for the regulation. Interestingly, more  
333 recent work from the same laboratory identified, confirmed by our present findings,

334 VTA Sst projections to the PVT and showed that this pathway regulates restorative  
335 sleep after stress (Yu et al., 2022). Here we, for the first time, to our knowledge,  
336 showed a direct connection between the VTA and aBNST through the Sst neurons.

337 Behavioural assessment of the deletion of the VTA Sst neurons revealed four  
338 major consequences: increased home-cage activity, altered response in the fear-  
339 conditioning, enhanced locomotor sensitization to the second dose of morphine and  
340 prolonged struggle during the inescapable stress of forced swimming. The first two  
341 changes showed also a significant sexual dimorphism.

342 Regarding the home-cage activity, it is well known that females are more active  
343 than males in the Intellicage environment where they are group-housed (Pernold et  
344 al., 2021, 2019), as we also observed (Table S1). Interestingly, the deletion of the  
345 VTA Sst neurons resulted in a further increase of the home-cage activity exclusively  
346 in the female mice (Fig. 5). The activity change was not associated with the novelty  
347 of the environment: it was consistent throughout the experiment and after several  
348 days of adaptation. Circadian patterns in single-housed animals determined during  
349 3-day access to free-running wheels failed to differ between VTA<sup>Sst-</sup> and control  
350 animals (Fig. S7). In addition, there was no change in locomotor activity, as the  
351 distance travelled in the open field was similar between the two treatment groups.  
352 Our data suggest that deletion of the VTA Sst neurons resulted in a specific increase  
353 in home-cage activity and only in group-housed female mice. The underlying  
354 mechanism of this distinct change needs further investigation.

355 Although several of the VTA Sst neuron projection targets, like the BNST (Lebow  
356 and Chen, 2016), CeM (Shackman and Fox, 2016) and PVT (Kirouac, 2021) are  
357 involved in the brain anxiety network, we did not see any significant differences in  
358 the anxiety-like behaviours in VTA<sup>Sst-</sup> mice. This was measured in a light-dark box,  
359 elevated plus maze, novelty-suppressed feeding tests (Fig. S8) or reaction to the air-



360 puffs (Fig. S11), and suggests the VTA Sst neurons might not be involved in innate  
361 threat and avoidance of elevated or brightly lit areas. On the contrary, our data  
362 indicated that these neurons could be meaningful for the responses to inescapable  
363 acute stressors, such as freezing after unexpected foot shock (fear-conditioning  
364 acquisition phase) or struggling when dipped into water (forced swim test).

365 Significant, but opposite changes in the reaction to the foot shock in males vs.  
366 females (Fig. 6b) was another interesting effect of VTA Sst neuron deletion, which  
367 again emphasizes differences in the VTA Sst+ projections or their functional  
368 outcome depending on the sex. It is important to note, that our data do not exclude  
369 the possibility that the nociceptive reaction itself was altered in the VTA<sup>Sst-</sup> animals  
370 explaining why VTA<sup>Sst-</sup> males froze less and VTA<sup>Sst-</sup> females froze more than controls  
371 in response to the foot shock. Interestingly, a recent study described a pathway  
372 from the laterodorsal tegmentum (LDTg) via VTA to the basolateral amygdala,  
373 inhibition of which reduced unconditioned freezing response to foot shocks in male  
374 mice, similar to what we observed in the VTA<sup>Sst-</sup> males (Broussot et al., 2022).  
375 Unfortunately, results on females were not reported in that study. Our results  
376 emphasize the importance of conducting experiments on both sexes, especially in  
377 case of aversive-stimuli reactions (see also Cover et al., 2014). Fear-conditioning test  
378 highlighted an interesting feature of the VTA Sst neuron function: these neurons  
379 were important for the contextual fear memory formation/retrieval, but not for the  
380 sound cue-associated responses, likely relating to differential processing of these  
381 two modalities of conditioned stimuli.

382 The fact that many brain regions receiving VTA Sst neuron projections belong to  
383 the extended amygdala suggests the involvement of these neurons in the action of  
384 addictive substances, such as opioids and alcohol (Koob et al., 2014a, 2014b). We  
385 did not see any differences in locomotor responses to acute morphine  
386 administration (Fig. 8a), indicating that the opioid stimulating effect was not

387 affected by the deletion of the VTA Sst neurons. This is consistent with the data on  
388 rats, where morphine actions on VTA DA neurons could be prevented by silencing  
389 GABA neurons in the rostromedial tegmental (RMTg, also called the tail of VTA)  
390 (Jalabert et al., 2011), which might be more meaningful for the acute disinhibitory  
391 action of opioids on VTA DA neurons. More importantly, we did observe that after  
392 the second morphine administration 7 days later, the VTA<sup>Sst</sup>- mice of both sexes  
393 demonstrated robustly increased locomotor sensitization, suggesting that the VTA  
394 Sst neurons normally limit the sensitization to opioids. This might be linked to  
395 morphine-induced adaptation of GABA<sub>A</sub> receptor-mediated transmission onto VTA  
396 DA neurons (Nugent et al., 2007), which would be missing from intra-VTA synapses  
397 of Sst neurons in caspase-treated VTA<sup>Sst</sup>- mice. This remains to be studied, especially  
398 since VTA Sst neurons are also projection neurons and can have long-distance circuit  
399 effects.

400 Interestingly, similar increase in opioid sensitization resulting in higher  
401 morphine preference afterwards (Shaham et al., 1992) is often observed as a  
402 consequence of stressful events (Kalivas et al., 1986; Leyton and Stewart, 1990), also  
403 of emotional nature (Kuzmin et al., 1996). Since it also has been shown that deletion  
404 of the VTA Sst neurons disrupt normal restorative sleep after social defeat stress (Yu  
405 et al., 2022), it is possible to speculate that in both cases the VTA Sst neurons are  
406 involved in the adaptive changes of the VTA circuit which might occur only during  
407 sleep. The fact that morphine challenge in our experiments was done 7 days later  
408 also speaks in favour of this. However, further research is needed to elucidate the  
409 actual mechanism of such adaptations.

410 Overall, our study has demonstrated that Sst neurons in the VTA, like in other  
411 brain areas, constitute a population of projection neurons, which together can form  
412 a brain-wide somatostatinergic system, as has been recently proposed (Viollet et al.,  
413 2008). Our data suggest sex-dependent differences in VTA Sst-neuron effects on

414 behaviour, which together with the restricted location within mouse VTA that we  
415 established here would make possible their targeted manipulation in optogenetic  
416 and electrophysiological studies on behaving animals in both sexes. Thus, our  
417 findings lay the base for more advanced experiments on the role of VTA Sst neurons  
418 in, e.g., addictions, depression and stress adaptation.

419

420

421

422

423

424

425

426

427

428

429

430

431

432

## 433 Materials & Methods

434 Animals. All experimental procedures were performed on male and female  
435 mice of either homozygous Sst-IRES-Cre ( $Sst^{tm2.1(cre)Zjh/J}$ ) or heterozygous genotype  
436 resulted from cross-breeding of Sst-IRES-Cre ( $Sst^{tm2.1(cre)Zjh/J}$ ) strain with Ai14  
437 tdTomato reporter strain (B6.Cg-Gt(ROSA)26Sor<sup>tm14(CAG-tdTomato)Hze/J</sup>). Two female Th-  
438 EGFP mice (Tg(Th-EGFP)DJ76Gsat) of the age P140 were used for the qPCR  
439 experiment on the dopamine neurons. Animals were group-housed in individually  
440 ventilated cages (IVC)-cages (Tecniplast Green Line GM500) under 12:12 h light/dark  
441 cycle (lights on 6 am – 6 pm) with *ad libitum* access to food (Global Diet 2916C,  
442 pellet 12 mm, Envigo) and water, unless otherwise indicated in the corresponding  
443 method section. Cages were equipped with bedding (500 ml aspen chips 5 x 5 x 1  
444 mm, 4HP, Tapvei), nesting material (aspen strips, PM90L, Tapvei) and a clear  
445 handling tube (10 cm length, 5 cm diameter). Animal experiments were authorized  
446 by the National Animal Experiment Board in Finland (Eläinlääketieteellinen tutkimus-  
447 ja tutkimuskeskus, ESAVI; license numbers: ESAVI/1172/04.10.07/2018 and ESAVI/1218/2021).

448 Tracing. The mice were anesthetized with a mixture of isoflurane (4% for  
449 induction, 0.5 – 2% for maintenance; Vetflurane, Virbac, Carros, France) and air  
450 (flow rate 0.8 – 1 l/min), after which they were placed into a stereotaxic frame (Kopf  
451 Instruments, Tujunga, CA, USA). Before opening incision on the scalp, iodopovidone  
452 was applied on the surgical region, and lubricative eye gel applied to prevent  
453 corneal damage.

454 For the anterograde tracing studies, stereotaxic coordinates AP: -3.3 ML:  $\pm$  0.3  
455 DV: -4.5 mm relative to bregma were used for the VTA, based on the Mouse Brain  
456 Atlas (Franklin and Paxinos, 2007) and verified with dye injections. A unilateral  
457 injection of 200 nl of AAV2/8-Cag-Flex-Myr-eGFP viral construct (lot 4x1012 genome  
458 copies/ml; AAV 319 lot, Neurophotonics Center, CERVO Brain Research Centre,

459 Quebec, Canada) was made with a flow rate of 0.1  $\mu\text{l}/\text{min}$ . A precision pump system  
460 (KD Scientific, Holliston, MA, USA) was used to control the injection rate.

461 For the retrograde tracing, the following stereotaxic coordinates were used  
462 (mm relative to bregma): for the BNST, AP: -0.1 ML:  $\pm 0.9$  DV: -4.2; for the CeA, AP: -  
463 1.5 ML:  $\pm 2.6$  DV: -4.7; for the LH, AP: -1.4 ML:  $\pm 1.1$  DV: -5.3; for the PVT, AP: -1.5 ML:  
464  $\pm 0.1$  DV: -3.2; for the VP, AP: +0.6 ML:  $\pm 1.3$  DV: -5.4. For each animal, a 600-nl  
465 unilateral injection of 1:1 mixture of green retrobeads (1:10 dilution in  $\text{dH}_2\text{O}$ ,  
466 Lumafluor Inc., Durham, NC, USA) and pAAV2-hSyn-DIO-EGFP retrograde virus  
467 construct ( $7.6 \times 10^{12}$  genome copies/ml; 50457-AAVrg, Addgene, Watertown, MA,  
468 USA) was made with a flow rate of 1.0  $\mu\text{l}/\text{min}$ . Retrobeads were used only for  
469 marking the injection site and not considered in the backtracing analysis. After the  
470 surgeries the mice were administered 5 mg/kg carprofen (s.c. Norocarp Vet 50  
471 mg/ml, Norbrook Laboratories Ltd, Newry, Northern Ireland) for postoperative  
472 analgesia, and were let to recover from anesthesia in a 37°C incubator until  
473 ambulatory. A recovery period of at least 3 weeks was allowed before further  
474 procedures.

475 Mice were anaesthetized with pentobarbital (200 mg/kg i.p., Mebunat, Orion  
476 Pharma, Espoo, Finland) and perfused transcardially with cold 1xPBS solution  
477 followed by 4% paraformaldehyde solution. After overnight in the same fixative  
478 solution, brains were transferred to 30% sucrose until sinking (at least 48 h). The  
479 brains were then frozen on dry ice and stored at -80°C until sectioned. For the  
480 anterograde tracing, 80- $\mu\text{m}$  coronal sections were cut throughout the brain, and for  
481 the retrograde tracing 40- $\mu\text{m}$  coronal sections from the injection site and the VTA  
482 were cut with cryostat (CM3050S, Leica Biosystems, Wetzlar, Germany).

483 To enhance the fluorescence signal of the antero-traced axons, anti-GFP  
484 immunostaining was performed. The sections were washed at room temperature in

485 1x PBS (5 min, 3 times), and blocked with 1% bovine serum albumin (BSA; Sigma  
486 Aldrich, Saint Louis, MO, USA) with 0.3% Triton X-100 (BDH Laboratory Supplies,  
487 Poole, UK) in 1x PBS for 1 h at room temperature. The sections were then incubated  
488 with the primary antibody (chicken anti-GFP 1:800 in blocking solution; ab13970,  
489 Abcam, Cambridge, UK) overnight at 4°C, washed with 1x PBS (5 min, 3 times) and  
490 incubated with the secondary antibody (goat anti-chicken with Alexa Fluor 488  
491 1:800 in blocking solution; ab150169, Abcam) for 2 h at room temperature. Sections  
492 were then washed once more with 1x PBS (5 min, 3 times), mounted on microscope  
493 slides, and coverslips were applied with Vectashield mounting medium (Vector  
494 Laboratories, Burlingame, CA, USA).

495 Imaging was performed with Zeiss Axio Imager Z2 (Zeiss AG, Oberkochen,  
496 Germany) with 10x air objective in tiles mode. Injection site was considered as  
497 successful if 90% of GFP-positive infected cell bodies were located within the VTA  
498 area. Sst nature of the infected cells was also confirmed by red inbuilt signal of  
499 tdTomato. Anterograde targets of the projecting cells were considered as positive by  
500 having maximum brightness due to GFP-expressing axonal arborization. The  
501 conclusion about the constancy of the projection target was made according to  
502 hierarchical clustering results produced by *hclust* function implemented in R  
503 programming environment  
504 (<https://www.rdocumentation.org/packages/stats/versions/3.6.2/topics/hclust>).  
505 Retrogradely traced neurons within the VTA were counted as positive by having  
506 clear co-expression of the inbuilt tdTomato signal and the GFP signal caused by the  
507 viral infection.

508 Electrophysiology and single-cell qPCR. To define electrophysiological and  
509 molecular profiles of the VTA projecting Sst neurons we combined backtracing with  
510 current-clamp recordings and single-cell qPCR. Backtracing was performed as  
511 described above (see Tracing section) on P60-P90 old Sst-IRES-Cre homozygous



512 animals of both sexes. Electrophysiology was done after at least 1 month of  
513 recovery as described previously (Nagaeva et al., 2020) with some modifications.  
514 Shortly, mice were perfused with ice-cold constantly oxygenated NMDG-based  
515 cutting solution. Coronal VTA sections of 225  $\mu\text{m}$  thickness were cut in the same  
516 solution using vibrotome HM650V (Thermo Scientific, Waltham, MA, USA) and  
517 transferred to the constantly oxygenated 33°C HEPES-ACSF solution for 15 min  
518 recovery and then remained in the same solution at room temperature until the end  
519 of the experiment (~ 3 h). For the injection site verification, sections were cut in the  
520 same way as the VTA sections and checked immediately with the epifluorescence  
521 microscope BX51WI (Olympus, Tokyo, Japan).

522         Electrophysiological registration of the firing patterns was performed in the  
523 same conditions as previously described (Nagaeva et al., 2020) to allow the data  
524 alignment. Backtraced Sst GFP-positive cells were identified with an epifluorescence  
525 microscope BX51WI and sCMOS camera Andor Zyla 5.5 (Oxford Instruments, Oxford,  
526 UK). Whole-cell current-clamp recordings were made using 3–5 M $\Omega$  borosilicate  
527 glass electrodes filled with 1–2  $\mu\text{L}$  of intracellular solution (IS) (containing in mM):  
528 130 K-gluconate, 6 NaCl, 10 HEPES, 0.5 EGTA, 4 Na<sub>2</sub>-ATP, 0.35 Na-GTP, 8 Na<sub>2</sub>-  
529 phosphocreatine (pH adjusted to 7.2 with KOH, osmolarity ~285 mOsm). 1 U/ $\mu\text{L}$   
530 TaKaRa RNase inhibitor (Takara, Shiga, Japan) was added before each experiment.  
531 Liquid junction potential (+12 mV) was not corrected during recordings.

532         All electrophysiological experiments were made with an Multiclamp 700B  
533 amplifier (Molecular Devices, USA) filtered at 2 kHz, and recorded with 10 kHz  
534 sampling rate using pClamp 10 software (Molecular Devices). After achieving whole-  
535 cell configuration in voltage-clamp mode (–70 mV), cell capacitance was determined  
536 by the 'Membrane Test' feature of the Clampfit software and the amplifier was then  
537 switched to current-clamp mode. Depolarized cells with RMP higher than –50 mV

538 were excluded. For measuring passive and active membrane properties, neurons  
539 were injected with 800-ms current steps with 10 pA increments, resulting in the  
540 membrane voltage fluctuation from -120 mV to the saturated level of firing. In  
541 addition, shorter protocol from 0 pA with 1 pA increment was applied for better  
542 identification of the action potential threshold and shape. All recordings were  
543 performed with intact GABAergic and glutamatergic transmission (i.e. no  
544 pharmacological agents were added to the aCSF).

545 *Extraction of mRNA.* After firing pattern registration, cell body was  
546 immediately sucked into the glass electrode with negative pressure and expelled  
547 onto a 1.1  $\mu$ l drop of the ice-cold lysis buffer (0.1% Triton X-100, 2 U/ $\mu$ l TaKaRa  
548 RNase inhibitor, 0.5  $\mu$ M Oligo-dT<sub>30</sub> primer, 11.5 mM dithiothreitol and 2.3 mM of  
549 dNTP mix) placed on the wall of cold RNase-free PCR tube, spun down and  
550 immediately frozen in dry ice. All samples were stored at -80°C until the reverse  
551 transcription step.

552 *Reverse transcription (RT) and pre-amplification.* Frozen samples were  
553 thawed at 72°C for 3 min. 2  $\mu$ l of RT mix (1x SuperScript IV buffer, 18 U/ $\mu$ l  
554 SuperScript IV reverse transcriptase (ThermoFisher Scientific, USA), 3.6  $\mu$ M TSO-  
555 chimera primer, 6 mM MgCl<sub>2</sub>, 0.8 M betaine and 1.5 U/ $\mu$ l TaKaRa RNase inhibitor)  
556 were added to each sample, mixed gently, spun down and then incubated in the  
557 thermocycler (52°C - 10 min, [60°C - 1 min, 52°C - 1 min] x 10 times, 80°C - 20 min).  
558 For further cDNA amplification, 20  $\mu$ l of PCR mix [1xPlatinum SuperFi II master mix,  
559 0.5  $\mu$ M PCR1 primer, 111 nM dNTP mix] were gently pipetted to each sample, which  
560 then underwent the following thermocycler program (98°C - 30 s, [98°C - 10 s, 60°C -  
561 11 s, 72°C - 6 min] x 25 times, 72°C - 5 min).

562 *qPCR analysis.* The synthesized cDNA samples were diluted to the  
563 concentration range 100-300 ng/ $\mu$ l with sterile DNase free water. Samples were

564 then amplified with PowerUp™ SYBR™ Green Master Mix (Applied Biosystems, USA)  
 565 following the instructions of the manufacturer. Quantitative PCR (qPCR) was  
 566 performed using LightCycler® 480 II system (Roche Diagnostics, Switzerland) with  
 567 the following conditions: UDG (uracil-DNA glycosylase) activation 2 min at 50°C, pre-  
 568 incubation 2 min at 95°C, followed by amplification steps 40 cycles of 15 s at 95°C  
 569 and 1 min at 60°C with melting curve. Expression of the following genes were  
 570 determined. *Sst*, *Th*, *Egfp*, *Nos1*, *Ddc*, *Gad1*, *Gad2*, *Slc17a6* (*Vglut2*), *Slc32a1* (*Vgat*),  
 571 and *Slc6a3* (*Dat*). The primer sequences were obtained from the PrimerBank  
 572 (<https://pga.mgh.harvard.edu/primerbank/index.html>). Primers were ordered from  
 573 Metabion (Metabion International AG, Germany) and actual sequences are listed in  
 574 table below this section. Every run included a negative control, a positive control  
 575 (bulk cDNA from mouse visual cortex) and blank (H<sub>2</sub>O). The qPCR reactions were  
 576 performed in triplicate for each sample, and their averages were used for Ct values.  
 577 The Ct values of EGFP were used to normalize expression by delta Ct method. The  
 578 relative expression was calculated based on the delta Ct values. Resulting values  
 579 were then normalized with log<sub>10</sub> transformation for the clustering procedure  
 580 performed as described in the “Tracing” part.

| PRIMERS LIST                     |                                               |
|----------------------------------|-----------------------------------------------|
| cDNA synthesis and amplification |                                               |
| Oligo-dT30                       | 5'-AAG CAG TGG TAT CAA CGC AGA GTA CT30AT-3'  |
| TSO-chimera                      | 5'-AAG CAG TGG TAT CAA CGC AGA GTA CAT ggg-3' |
| PCR1                             | 5'-AAG CAG TGG TAT CAA CGC AGA GT-3'          |

581

| qPCR                           |                                     |                                   |
|--------------------------------|-------------------------------------|-----------------------------------|
| Gene                           | forward                             | reverse                           |
| <i>Sst</i>                     | 5'-ACC GGG AAA CAG GAA CTG G-3'     | 5'-TTG CTG GGT TCG AGT TGG C-3'   |
| <i>Slc32a1</i> - <i>Vgat</i>   | 5'-ACC TCC GTG TCC AAC AAG TC-3'    | 5'-CAA AGT CGA GAT CGT CGC AGT-3' |
| <i>Slc17a6</i> - <i>Vglut2</i> | 5'-TGG AAA ATC CCT CGG ACA GAT-3'   | 5'-CAT AGC GGA GCC TTC TTC TCA-3' |
| <i>Th</i>                      | 5'-GTC TCA GAG CAG GAT ACC AAG C-3' | 5'-CTC TCC TCG AAT ACC ACA GCC-3' |
| <i>Slc6a3</i> - <i>Dat</i>     | 5'-AAA TGC TCC GTG GGA CCA ATG-3'   | 5'-GTC TCC CGC TCT TGA ACC TC-3'  |

|      |                                   |                                      |
|------|-----------------------------------|--------------------------------------|
| Ddc  | 5'-TAGCTGACTATCTGGATGGCAT-3'      | 5'-GTCCTCGTATGTTTCTGGCTC-3'          |
| Gad1 | 5'-CAC AGG TCA CCC TCG ATT TTT-3' | 5'-ACC ATC CAA CGA TCT CTC TCA TC-3' |
| Gad2 | 5'-TCC GGC TTT TGG TCC TTC G-3'   | 5'-ATG CCG CCC GTG AAC TTT T-3'      |
| EGFP | 5'-AGT CCG CCC TGA GCA AAG A-3'   | 5'-TCC AGC AGG ACC ATG TGA TC-3'     |
| Nos1 | 5'-CTGGTGAAGGAACGGGTCAG-3'        | 5'-CCGATCATTGACGGCGAGAAT-3'          |

582

583 Caspase experiments. For the caspase manipulations, Sst-tdTomato  
584 heterozygous male and female mice of the age P60-P75 (on the injection day) were  
585 used. All the injection procedures were similar to those described in the "Tracing"  
586 part of the Methods. Slightly modified coordinates for the VTA were used, aiming at  
587 the antero-lateral Sst sub-population (Nagaeva et al., 2020) and based on the results  
588 of the retrograde tracing to hit the majority of the projecting VTA Sst neurons (mm  
589 relative to bregma): AP: -3.1, ML:  $\pm 0.7$ , DV: -4.6. 600-nl bilateral injections of 1:1  
590 mixture of AAV1/2-DIO-taCasp3-TEV ( $3 \times 10^{12}$  genome copies/ml, a kind gift from  
591 professor William Wisden) and AAV2/8-CAG-Flex-Myr-eGFP ( $4 \times 10^{12}$  genome  
592 copies/ml; Neurophotonic Center, CERVO Brain Research Centre, Quebec, Canada)  
593 viral constructs, or 1:1 dH<sub>2</sub>O dilution of AAV2/8-CAG-Flex-Myr-eGFP for the controls,  
594 were made with a flow rate of 0.1  $\mu$ l/min. After surgery, mice had a recovery period  
595 of 4 weeks before the behavioural tests.

596 Confirmation of the deletion of VTA Sst neurons was made after the end of all  
597 behavioural experiments. Mice were perfused as described in the "Tracing"  
598 methods section. Forty- $\mu$ m-thick coronal sections containing the VTA area were  
599 made and imaged with the epifluorescence microscope. Number of the GFP-  
600 expressing cells were counted in the control and caspase groups and compared. The  
601 caspase brains where injection site did not reach the VTA, were too lateral, or too  
602 medial were excluded from the analysis (4 mice from cohort 1; 2 from cohort 2, and

603 5 mice from the “Intellicage cohort”). Subjective exclusion was performed by two  
604 independent researchers.

605

## 606 Behavioural experiments

607 General description: 17 (9 male, 8 female) VTA<sup>Sst-</sup> and 21 (10 male, 11 female)  
608 VTA<sup>Sst+</sup> control mice underwent a battery of behavioural tests to study reward- and  
609 anxiety-related behaviours. Experiments were performed in the morning between 7  
610 am and 1 pm. Mice were always habituated to the testing room 45 – 60 min prior  
611 the experiment. Arenas were cleaned thoroughly with water between animals.  
612 Researchers conducting the experiments were blinded to the treatment group of  
613 the animals. Mice were initially group-housed, but then single-housed (including 7  
614 days habituation) for conducting the novelty-suppressed feeding, sucrose  
615 preference, running wheel activity and morphine sensitization tests (see the  
616 schematic timeline below). To reduce stress from the injection, mice underwent a 5-  
617 day habituation routine prior to morphine injections as described before (Elsilä et  
618 al., 2022)

619

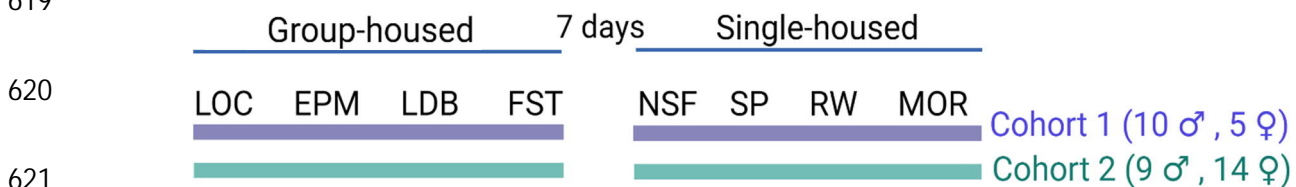

621

622 Novelty-induced locomotor activity (LOC) and morphine sensitization (MOR).  
623 The experiment was performed as described previously (Vashchinkina et al., 2012).  
624 Shortly, mice were released one by one in the novel open arena (36 x 19 x 20 cm).  
625 Distance moved was recorded during 60 min with EthoVision XT 10 tracking  
626 equipment (Noldus, Netherlands). Illumination in the room was approximately 50  
627 lux.

628 For morphine-sensitization, each mouse was habituated to the arena for 60  
629 min after which it received a morphine injection (20 mg/kg, i.p.) and were  
630 immediately placed back in the arena. Mice remained in the arena for 3 h, and  
631 locomotor behaviour was monitored using EthoVision (induction day). After the  
632 testing, mice were put back to their home cage. Mice were challenged with a  
633 morphine injection 7 days later, and the experiment was repeated in the same  
634 context (challenge day). Sensitization to the morphine-enhanced locomotor activity  
635 was calculated as difference of distance moved on the challenge day minus distance  
636 moved on the induction day.

637 Elevated plus maze (EPM). The elevated plus maze was made out of gray  
638 plastic and consisted of a central platform (5 x 5 cm), from which two open arms  
639 and two enclosed arms (5 x 40 x 20 cm) extended at an elevation of 50 cm from the  
640 floor (Lister R.G., 1987). The light intensity of the closed arms were 10 lux and open  
641 arm 200 lux. The mouse was placed on the central platform facing a closed arm and  
642 allowed free exploration of the maze for 5 min. Distance moved and time spent in  
643 different arms was recorded with EthoVision. Time spent in the open arm was  
644 calculated as the percentage from the total time spent in all arms.

645 Light-dark box (LDB). The test was performed in an open-field arena (43.2 x  
646 43.2 x 30.5 cm, ENV-515, Med Associates Inc., St. Albans, VT) equipped with infrared  
647 light transmitters and sensors detecting horizontal and vertical activity. The dark  
648 insert (non-transparent for visible light) was used to divide the arena into two  
649 equally sized compartments. An open door (width of 5.5cm and height of 7 cm) in  
650 the wall of the insert allowed the animal to freely move between compartments.  
651 Illumination in the light compartment from bright ceiling lights was ~ 200 lm. The  
652 animal was released in the door, head facing the dark compartment and allowed to  
653 explore the arena for 5 min. Distance moved and time spent in different



654 compartments were recorded by the system. Time spent in the light compartment  
655 was calculated as the percentage from the total time spent in both compartments.

656 Forced swim test (FST). The mouse was placed for 6 min in a glass beaker  
657 (diameter 15 cm, height 25 cm) filled with 3 L of water at  $23 \pm 1^\circ\text{C}$  (Procaccini et al.,  
658 2011). Three visually isolated mice were recorded simultaneously using a digital  
659 video camera. Latency to the first immobility and time of total immobility (i.e.  
660 passive floating, when an animal was motionless and only doing slight movement  
661 with a tail or one hind limb, in contrast to struggling, climbing or swimming with all  
662 four paws) were measured manually in 2-min intervals by a blinded researcher.

663 Novelty-suppressed feeding (NSF). Mice were single-housed and food-  
664 restricted for 14 h before testing to motivate food-seeking behaviour. Water was  
665 given *ad libitum*. Mice were tested in an open arena (50 x 50 x 28 cm) at an  
666 illumination of 200 lux. A lid from a 50-mL falcon tube was placed in the middle of  
667 the arena that contained a small amount of moist food. The mouse was released  
668 next to the wall, and its behaviour was recorded using EthoVision. Latency until the  
669 mouse started eating (i.e. eating for more than 5 s) was monitored manually by a  
670 researcher, after which the trial was terminated (maximum cut-off point 10 min).  
671 The mouse was returned to its home cage, where it was again presented with a  
672 small amount of moist food. Latency until first in-cage eating was monitored as  
673 previously. This was done to account for possible differences in hunger between  
674 animals.

675 Sucrose preference test (SP). Two-bottle choice sucrose preference test was  
676 carried out for 7 days (Lainiola et al., 2019). Mice were single-housed in larger IVC-  
677 cages allowing the use of two drinking bottles. Drinking bottles were weighted daily  
678 at 10:00 am to monitor consumption. The position of the water and sucrose bottles  
679 were changed every day to avoid the development of side preference. Mouse body

680 weights were measured before and after the start of the experiment. Sucrose  
681 concentrations were based on an earlier study analysing sucrose preference in C57  
682 mice (Sclafani, 2006) and were increased as follows: 0.1% (two days), 0.5% (two  
683 days) and 1% sucrose (three days). Average was taken for each sucrose  
684 concentration. Sucrose preference was calculated as a percentage of sucrose  
685 consumption out of the total fluid intake.

686 Circadian rhythm of wheel running (RW) activity. To measure voluntary wheel  
687 running activity, free-running wheels (MedAssociates Inc.) was placed in the IVC  
688 cage of a single-housed mouse. Rotation of the wheel by the mouse was transmitted  
689 as electronic signal wirelessly to a hub and recorded on the Wheel Manager  
690 software. Data was exported every morning, and running wheels were checked for  
691 proper functioning. Voluntary running wheel activity was followed for 3 days, of  
692 which the first day was considered as habituation followed by two days of basal  
693 activity. Ten mice, which did not use the running wheel and ran <100 rotations over  
694 a course of 3 days, were excluded from the analysis.

695 IntelliCage (IC). A separate "Intellcage cohort" of 15 males and 16 females  
696 were subcutaneously injected with RFID transponders (Planet ID GmbH, Germany)  
697 for individual identification. The IntelliCage by NewBehaviour (TSE Systems,  
698 Germany) is an apparatus designed to fit inside a large cage (610 x 435 x 215 mm,  
699 Tecniplast 2000P). The apparatus itself provides four recording chambers that fit  
700 into the corners of the housing cage. Access into the chambers was provided via a  
701 tubular antenna (50 mm outer and 30 mm inner diameter) reading the transponder  
702 codes. The chamber contains two openings of 13 mm diameter (one on the left, one  
703 on the right), which gave access to drinking bottles. These openings are crossed by  
704 photo beams recording nose-pokes of the mice and the holes can be closed by  
705 motorized doors. Four triangular red shelters (Tecniplast, Buguggiate, Italy) were  
706 placed in the middle of the IntelliCage and used as sleeping quarters and as a stand

707 to reach the food. The floor was covered with a thick (2-3 cm) layer of bedding. The  
708 IntelliCage was controlled by a computer with dedicated software (IntelliCagePlus),  
709 executing preprogrammed experimental schedules and registering the number and  
710 duration of visits to the corner chambers, nose-pokes to the door openings and  
711 lickings as behavioural measures for each mouse. To randomize treatment groups  
712 and allow non-competitive access to the corners mice were housed in 4 Intellicages  
713 in balanced groups of the same sex (e.g. 4 control + 4 caspase). The mice were  
714 group-housed in these groups from weaning (cage type Tecniplast Green Line  
715 GR900), at least 10 weeks before the start of Intellicage experiments. All tests in  
716 Intellicage system were done in the order they are listed below on the consecutive  
717 days without taking mice out from the cages except as on two cleaning days.

718 *Free adaptation.* In the beginning of the test, the mice were released in the  
719 IntelliCage during the light phase at 9 am with all doors open allowing unlimited  
720 access to the water bottles (free adaptation). Animals were allowed to explore the  
721 new environment for 3 consecutive days. Exploratory, locomotor and circadian  
722 activity were measured as a number of corner visits or as nose-pokes to the water  
723 bottles per hour for each day separately (day 1 – adaptation phase, day 2 and 3 –  
724 basic activity). Similarly, drinking behaviour was measured as a number of licks/h.

725 *Adaptation to nose-poke.* On the fourth day, all doors were closed at the  
726 beginning of the experiment and mice were required to poke into closed gates to  
727 reach drinking tubes. Only the first nose-poke of the visit opened the door for 5  
728 seconds (pre-defined time). Animals had to start a new visit in order to get access to  
729 water again. This rule was the same in all experiments requiring nose-poking.

730 *Saccharin preference.* In this task, all four corners operated the same way, 24  
731 h per day: doors opened spontaneously for a 7-s drinking period on the entry to  
732 corner. Each corner contained a bottle of saccharine on one side and a bottle of

733 water on the other. High and low saccharine concentrations were chosen based on  
 734 the previous research (Pijlman et al., 2003; Sclafani et al., 2010). Every day,  
 735 saccharine and water sides were alternated to exclude side preference. During the  
 736 first three days, mice were suggested to choose between two low saccharine  
 737 concentrations 0.01% (S1) and 0.03% (S2) assigned to two opposite corners each.  
 738 During the next three days the lowest 0.01% (S1) concentration was exchanged to  
 739 the highest 0.3% (S3) one and the order of the corners was changed as well. For  
 740 better understanding of the schedule, below there is a simplified scheme with the  
 741 corners and sides assignments.

|     |                                                                                    |                                                |
|-----|------------------------------------------------------------------------------------|------------------------------------------------|
| 742 | 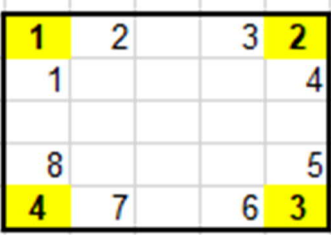 |                                                |
| 743 |                                                                                    | Day 1 S-Pref 1 S1 - 2,5; S2 - 4,7; W - 1,3,6,8 |
| 744 |                                                                                    | Day 2 S-Pref 1 S1 - 1,6; S2 - 3,8; W - 2,4,5,7 |
| 745 |                                                                                    | Day 3 S-Pref 1 S1 - 2,5; S2 - 4,7; W - 1,3,6,8 |
|     |                                                                                    | Day 1 S-Pref 2 S2 - 4,7; S3 - 2,5; W - 1,3,6,8 |
|     |                                                                                    | Day 2 S-Pref 2 S2 - 3,8; S3 - 1,6; W - 2,4,5,7 |
|     |                                                                                    | Day 3 S-Pref 2 S2 - 4,7; S3 - 2,5; W - 1,3,6,8 |

746 The preference score was calculated as percentage of the number of licks to  
 747 the certain liquid (two saccharine liquids of different concentrations and two water  
 748 liquids in corresponding saccharine corners) from the total number of licks during  
 749 the last two days of each session.

750 *Delay discounting.* In this experiment all four corners were accessible to all  
 751 animals and contained 0.3% saccharine liquid (S3) on one side of the corner and  
 752 water on the other side. The order of the bottles was as follows (see the picture  
 753 above): S3 - 1,3,6,8; W - 2,4,5,7. On Day 0 both doors to the water and saccharine  
 754 opened simultaneously for 7 s upon the entry to the corner. On Day 1, saccharine  
 755 door opened with a 0.5-s delay, while the water bottle door opened immediately.  
 756 Next day, delay before the opening of the saccharine door increased to 1 s and then  
 757 for 1 s every next 24 h. After 4 days, this resulted in a delay of 5 s. A saccharin

758 preference score was calculated as percentage of lick number to saccharin bottles  
759 form a total lick number (saccharin + water).

760 *Saccharine extinction and avoidance.* In these two tasks the set up was very  
761 similar in general and differed only in the third phase. Water was always available  
762 on the entry in two corners for all animals. Saccharine 0.3% (S3) was available with a  
763 rule in one corner for 4 specific mice (2 caspase+2 controls) and in another corner  
764 for the remaining 4 mice to avoid competition. The rule was as follows: to get the  
765 saccharine mice had to nose-poke in one of the side doors, it triggered the LED light  
766 above this door for 1.5 s and then it opened after an extra 0.5-s delay for 5 s. Mice  
767 had to repeat the sequence in order to get the additional access to the saccharine.  
768 In Phase 1 (33 h), mice were learning the rule; in Phase 2 (48 h) mice were adapted  
769 to the rule and the basic activity was measured; in Phase 3 (38 h) saccharine bottles  
770 were emptied for the "Extinction" experiment. In the "Avoidance" experiment mice  
771 went through the same sequence of events, but in the Phase 1 saccharine bottles  
772 were back, and the order of the corners was changed, so they had to learn new rules  
773 (re-learning). In Phase 3 (Avoidance), mice received 0.2-bar air puffs in the  
774 saccharine door with 25% probability. Activity was measured during the whole  
775 experiment as a number of nose-pokes/h. Similarly, drinking behaviour was  
776 measured as licks/h.

777 Fear conditioning (FC). For these experiments, the same "Intellicage cohort" of  
778 mice was used. Animals were single-housed after the Intellicage experiments and  
779 given 2 weeks of adaptation prior the FC. The FC protocol was based on previously  
780 published studies (Mennesson et al., 2020) with few modifications and consisted  
781 from three phases: acquisition, context test and cue test. Shortly, mice were placed  
782 one by one to the test chamber (Video fear conditioning, Med Associates Inc.) for  
783 the fear *acquisition and conditioning*. After 120-s of free exploration, a 30-s 5 kHz  
784 90-dB cue tone sounded from the wall-mounted speakers, co-terminated with a 2-s

785 scrambled 0.6-mA shock through the grid floor. Cue-shock pairs were repeated  
786 twice again with 90 and 60 s inter-trial intervals, after that the session was finished  
787 with 120 s of free exploration. Chamber light, near-infrared light and a fan were on  
788 during all phases. After each mouse the chamber was cleaned with water.

789         Nine days later, the mice were tested in the same chambers for the *context-*  
790 induced retrieval of the fear memory. For that, the mouse was placed to the same  
791 testing chamber with identical conditions as before, except for no cue tones or  
792 shocks, for 300 s of free exploration.

793         Five hours after the context test, *cue*-induced retrieval of the fear memory was  
794 assessed in the conditioning chamber with the floor and wall material and the shape  
795 of the chamber changed to exclude the context component. After 120 s of free  
796 exploration, the mouse was introduced with twenty 30-s cue tones (identical with  
797 those used during conditioning) separated by 5-s inter-tone intervals. After each  
798 mouse, the chamber was cleaned with 70% ethanol.

799         Freezing time and number of freezing episodes were automatically analyzed by  
800 Video Freeze Software (Med Associates Inc.) separately for each component of the  
801 test phases.

802         Drugs: Morphine hydrochloride (University Pharmacy, Helsinki, Finland) was  
803 dissolved in physiological saline (0.9% NaCl) on the day of treatment. Morphine was  
804 injected in a volume of 10 mL/kg body weight.

805         Statistics. For behavioural experiments, statistical analysis was done using  
806 SPSS (IBM SPSS Statistics, 28.0.0.0) while graphs were drawn with Prism 8.1.10. The  
807 data were tested for normality and homogeneity of variance using the Kolmogorov-  
808 Smirnov and Levene's tests, respectively. Statistical analyses of the data were done  
809 using one-way, univariate and repeated measures two-way ANOVAs unless stated  
810 otherwise. In case of significant main effect or interaction, post-hoc tests were



811 performed using multiple comparisons test with Bonferroni correction. The level of  
812 significance was set at 0.05. All data are shown as means  $\pm$  SEM.

813

#### 814 Reference list

815 Björklund A, Dunnett SB. 2007. Dopamine neuron systems in the brain: an update.  
816 *Trends Neurosci* 30:194–202. doi:10.1016/j.tins.2007.03.006

817 Bouarab C, Thompson B, Polter AM. 2019. VTA GABA Neurons at the Interface of  
818 Stress and Reward. *Front Neural Circuits* 13:1–12. doi:10.3389/fncir.2019.00078

819 Broussot L, Contesse T, Costa-Campos R, Glangetas C, Royon L, Fofo H, Lorivel T,  
820 Georges F, Fernandez SP, Barik J. 2022. A non-canonical GABAergic pathway to  
821 the VTA promotes unconditioned freezing. *Mol Psychiatry* 1–13.  
822 doi:10.1038/s41380-022-01765-7

823 Cadwell CR, Scala F, Li S, Livrizzi G, Shen S, Sandberg R, Jiang X, Tolias AS. 2017.  
824 Multimodal profiling of single-cell morphology, electrophysiology, and gene  
825 expression using Patch-seq. *Nat Protoc* 12:2531–2553.  
826 doi:10.1038/nprot.2017.120

827 Cai J, Tong Q. 2022. Anatomy and Function of Ventral Tegmental Area Glutamate  
828 Neurons. *Front Neural Circuits* 16. doi:10.3389/fncir.2022.867053

829 Concetti C, Bracey EF, Peleg-Raibstein D, Burdakov D. 2020. Control of fear  
830 extinction by hypothalamic melanin-concentrating hormone-expressing  
831 neurons. *Proc Natl Acad Sci U S A* 117:22514–22521.  
832 doi:10.1073/pnas.2007993117

833 Corre J, van Zessen R, Loureiro M, Patriarchi T, Tian L, Pascoli V, Lüscher C. 2018.  
834 Dopamine neurons projecting to medial shell of the nucleus accumbens drive

- 835 heroin reinforcement. *Elife* 7:1–22. doi:10.7554/eLife.39945
- 836 Cover KK, Maeng LY, Lebrón-Milad K, Milad MR. 2014. Mechanisms of estradiol in  
837 fear circuitry: Implications for sex differences in psychopathology. *Transl*  
838 *Psychiatry* 4. doi:10.1038/tp.2014.67
- 839 Dobi A, Margolis EB, Wang HL, Harvey BK, Morales M. 2010. Glutamatergic and  
840 nonglutamatergic neurons of the ventral tegmental area establish local synaptic  
841 contacts with dopaminergic and nondopaminergic neurons. *J Neurosci* 30:218–  
842 229. doi:10.1523/JNEUROSCI.3884-09.2010
- 843 Elsilä L V., Harkki J, Enberg E, Martti A, Linden AM, Korpi ER. 2022. Effects of acute  
844 lysergic acid diethylamide on intermittent ethanol and sucrose drinking and  
845 intracranial self-stimulation in C57BL/6 mice. *J Psychopharmacol* 36:860–874.  
846 doi:10.1177/02698811221104641
- 847 Franklin KBJ, Paxinos G. 2007. The Mouse Brain in Stereotaxic Coordinates (map),  
848 Academic Press.
- 849 Fuzik J, Zeisel A, Máté Z, Calvigioni D, Yanagawa Y, Szabó G, Linnarsson S, Harkany T.  
850 2016. Integration of electrophysiological recordings with single-cell RNA-seq  
851 data identifies neuronal subtypes. *Nat Biotechnol* 34:175–183.  
852 doi:10.1038/nbt.3443
- 853 Gao C, Leng Y, Ma J, Rooke V, Rodriguez-Gonzalez S, Ramakrishnan C, Deisseroth K,  
854 Penzo MA. 2020. Two genetically, anatomically and functionally distinct cell  
855 types segregate across anteroposterior axis of paraventricular thalamus. *Nat*  
856 *Neurosci* 23:217–228. doi:10.1038/s41593-019-0572-3
- 857 Gomes-de-Souza L, Costa-Ferreira W, Mendonça MM, Xavier CH, Crestani CC. 2021.  
858 Lateral hypothalamus involvement in control of stress response by bed nucleus  
859 of the stria terminalis endocannabinoid neurotransmission in male rats. *Sci Rep*

- 860 11:1–12. doi:10.1038/s41598-021-95401-z
- 861 Goode TD, Maren S. 2017. Role of the bed nucleus of the stria terminalis in aversive  
862 learning and memory. *Learn Mem* 24:480–491. doi:10.1101/lm.044206.116
- 863 Hnasko TS, Hjelmstad GO, Fields HL, Edwards RH. 2012. Ventral Tegmental Area  
864 Glutamate Neurons: Electrophysiological Properties and Projections. *J Neurosci*  
865 32:15076–15085. doi:10.1523/JNEUROSCI.3128-12.2012
- 866 Jalabert M, Bourdy R, Courtin J, Veinante P, Manzoni OJ, Barrot M, Georges F. 2011.  
867 Neuronal circuits underlying acute morphine action on dopamine neurons. *Proc*  
868 *Natl Acad Sci U S A* 108:16446–16450. doi:10.1073/pnas.1105418108
- 869 Johnson SW, North RA. 1992. Opioids excite dopamine neurons by hyperpolarization  
870 of local interneurons. *J Neurosci* 12:483–488.
- 871 Kalivas PW, Richardson-Carlson R, Van Orden G. 1986. Cross-sensitization between  
872 foot shock stress and enkephalin-induced motor activity. *Biol Psychiatry* 21:939–  
873 950. doi:10.1016/0006-3223(86)90268-4
- 874 Keifer OP, Hurt RC, Ressler KJ, Marvar PJ. 2015. The physiology of fear:  
875 Reconceptualizing the role of the central amygdala in fear learning. *Physiology*  
876 30:389–401. doi:10.1152/physiol.00058.2014
- 877 Kim Y, Yang GR, Pradhan K, Venkataraju KU, Bota M, García del Molino LC, Fitzgerald  
878 G, Ram K, He M, Levine JM, Mitra P, Huang ZJ, Wang X-J, Osten P. 2017. Brain-  
879 wide Maps Reveal Stereotyped Cell-Type-Based Cortical Architecture and  
880 Subcortical Sexual Dimorphism. *Cell* 171:456-469.e22.  
881 doi:10.1016/j.cell.2017.09.020
- 882 Kirouac GJ. 2021. The Paraventricular Nucleus of the Thalamus as an Integrating and  
883 Relay Node in the Brain Anxiety Network. *Front Behav Neurosci* 15:1–14.  
884 doi:10.3389/fnbeh.2021.627633

- 885 Kirouac GJ. 2015. Placing the paraventricular nucleus of the thalamus within the  
886 brain circuits that control behaviour. *Neurosci Biobehav Rev* 56:315–329.  
887 doi:10.1016/j.neubiorev.2015.08.005
- 888 Koob GF, Arends MA, Le Moal M. 2014a. Drugs, Addiction, and the Brain - Alcohol,  
889 Drugs, Addiction, and the Brain. doi:10.1016/B978-0-12-386937-1.00006-4
- 890 Koob GF, Arends MA, Le Moal M. 2014b. Opioids, Drugs, Addiction, and the Brain.  
891 doi:10.1016/B978-0-12-386937-1.00005-2
- 892 Kuzmin A, Semenova S, Zvartau EE, Van Ree JM. 1996. Enhancement of morphine  
893 self-administration in drug naive, inbred strains of mice by acute emotional  
894 stress. *Eur Neuropsychopharmacol* 6:63–68. doi:10.1016/0924-977X(95)00066-X
- 895 Lainiola M, Hietala L, Linden AM, Aitta-aho T. 2019. The lack of conditioned place  
896 preference, but unaltered stimulatory and ataxic effects of alcohol in mGluR3-  
897 KO mice. *J Psychopharmacol* 33:855–864. doi:10.1177/0269881119844178
- 898 Lebow MA, Chen A. 2016. Overshadowed by the amygdala: the bed nucleus of the  
899 stria terminalis emerges as key to psychiatric disorders. *Mol Psychiatry* 21:450–  
900 463. doi:10.1038/mp.2016.1
- 901 Leyton M, Stewart J. 1990. Preexposure to foot-shock sensitizes the locomotor  
902 response to subsequent systemic morphine and intra-nucleus accumbens  
903 amphetamine. *Pharmacol Biochem Behav* 37:303–310. doi:10.1016/0091-  
904 3057(90)90339-J
- 905 Li X, Qi J, Yamaguchi T, Wang HL, Morales M. 2013. Heterogeneous composition of  
906 dopamine neurons of the rat A10 region: Molecular evidence for diverse  
907 signaling properties. *Brain Struct Funct* 218:1159–1176. doi:10.1007/s00429-  
908 012-0452-z
- 909 Li Y, Li CY, Xi W, Jin S, Wu ZH, Jiang P, Dong P, He X Bin, Xu FQ, Duan S, Zhou YD, Li

- 910 XM. 2019. Rostral and Caudal Ventral Tegmental Area GABAergic Inputs to  
911 Different Dorsal Raphe Neurons Participate in Opioid Dependence. *Neuron*  
912 101:748-761.e5. doi:10.1016/j.neuron.2018.12.012
- 913 López-Ferreras L, Richard JE, Anderberg RH, Nilsson FH, Olandersson K, Kanoski SE,  
914 Skibicka KP. 2017. Ghrelin's control of food reward and body weight in the  
915 lateral hypothalamic area is sexually dimorphic. *Physiol Behav* 176:40–49.  
916 doi:10.1016/j.physbeh.2017.02.011
- 917 Maren S. 2001. Neurobiology of Pavlovian Fear Conditioning. *Annu Rev Neurosci*  
918 24:897–931. doi:10.1146/annurev.neuro.24.1.897
- 919 Martin WR, Wikler A, Eades CG, Pescor FT. 1963. Tolerance to and physical  
920 dependence on morphine in rats. *Psychopharmacologia* 4:247–260.  
921 doi:10.1007/BF00408180
- 922 Mennesson M, Orav E, Gigliotta A, Kuleskaya N, Saarnio S, Kirjavainen A, Kesaf S,  
923 Winkel F, Pou ML, Umemori J, Voikar V, Risbrough V, Partanen J, Castrén E, Lauri  
924 SE, Hovatta I. 2020. Kainate receptor auxiliary subunit neto2-related cued fear  
925 conditioning impairments associate with defects in amygdala development and  
926 excitability. *eNeuro* 7:1–15. doi:10.1523/ENEURO.0541-19.2020
- 927 Mitchell SH. 2014. Assessing delay discounting in mice. *Curr Protoc Neurosci* 1–15.  
928 doi:10.1002/0471142301.ns0830s66
- 929 Nagaeva E, Zubarev I, Bengtsson Gonzales C, Forss M, Nikouei K, de Miguel E, Elsilä  
930 L, Linden A-M, Hjerling-Leffler J, Augustine GJ, Korpi ER. 2020. Heterogeneous  
931 somatostatin-expressing neuron population in mouse ventral tegmental area.  
932 *Elife* 9:1–29. doi:10.7554/eLife.59328
- 933 Nagaeva E, Zubarev I, Korpi E. 2021. Electrophysiological Properties of Neurons:  
934 Current-Clamp Recordings in Mouse Brain Slices and Firing-Pattern Analysis.

- 935 *BIO-PROTOCOL* 11:1–23. doi:10.21769/BioProtoc.4061
- 936 Nugent FS, Penick EC, Kauer JA. 2007. Opioids block long-term potentiation of  
937 inhibitory synapses. *Nature* 446:1086–1090. doi:10.1038/nature05726
- 938 Penzo MA, Robert V, Tucciarone J, De Bundel D, Wang M, Van Aelst L, Darvas M,  
939 Parada LF, Palmiter RD, He M, Huang ZJ, Li B. 2015. The paraventricular  
940 thalamus controls a central amygdala fear circuit. *Nature* 519:455–459.  
941 doi:10.1038/nature13978
- 942 Pernold K, Iannello F, Low BE, Rigamonti M, Rosati G, Scavizzi F, Wang J, Raspa M,  
943 Wiles M V., Ulfhake B. 2019. Towards large scale automated cage monitoring -  
944 Diurnal rhythm and impact of interventions on in-cage activity of C57BL/6J mice  
945 recorded 24/7 with a non-disrupting capacitive-based technique. *PLoS One*  
946 14:1–20. doi:10.1371/journal.pone.0211063
- 947 Pernold K, Rullman E, Ulfhake B. 2021. Major oscillations in spontaneous home-cage  
948 activity in C57BL/6 mice housed under constant conditions. *Sci Rep* 11:1–13.  
949 doi:10.1038/s41598-021-84141-9
- 950 Phillips RA, Tuscher JJ, Black SL, Andraka E, Fitzgerald ND, Ianov L, Day JJ. 2022. An  
951 atlas of transcriptionally defined cell populations in the rat ventral tegmental  
952 area. *Cell Rep* 39:110616. doi:10.1016/j.celrep.2022.110616
- 953 Pijlman FTA, Wolterink G, Van Ree JM. 2003. Physical and emotional stress have  
954 differential effects on preference for saccharine and open field behaviour in  
955 rats. *Behav Brain Res* 139:131–138. doi:10.1016/S0166-4328(02)00124-9
- 956 Procaccini C, Aitta-Aho T, Jaako-Movits K, Zharkovsky A, Panhelainen A, Sprengel R,  
957 Linden AM, Korpi ER. 2011. Excessive novelty-induced c-Fos expression and  
958 altered neurogenesis in the hippocampus of GluA1 knockout mice. *Eur J*  
959 *Neurosci* 33:161–174. doi:10.1111/j.1460-9568.2010.07485.x



- 960 Quina LA, Walker A, Morton G, Han V, Turner EE. 2020. GAD2 expression defines a  
961 class of excitatory lateral habenula neurons in mice that project to the raphe  
962 and pontine tegmentum. *eNeuro* 7:1–19. doi:10.1523/ENEURO.0527-19.2020
- 963 R.G. L. 1987. The use of a plus-maze to measure anxiety in the mouse.  
964 *Psychopharmacology (Berl)* 92:180–185.
- 965 Radwanska K, Kaczmarek L. 2012. Characterization of an alcohol addiction-prone  
966 phenotype in mice. *Addict Biol* 17:601–612. doi:10.1111/j.1369-  
967 1600.2011.00394.x
- 968 Schultz W, Dayan P, Montague PR. 1997. A neural substrate of prediction and  
969 reward. *Science (80- )*. doi:10.1126/science.275.5306.1593
- 970 Sclafani A. 2006. Enhanced sucrose and Polycose preference in sweet “sensitive”  
971 (C57BL/6J) and “subsensitive” (129P3/J) mice after experience with these  
972 saccharides. *Physiol Behav* 87:745–756. doi:10.1016/j.physbeh.2006.01.016
- 973 Sclafani A, Bahrani M, Zukerman S, Ackroff K. 2010. Stevia and saccharin preferences  
974 in rats and mice. *Chem Senses* 35:433–443. doi:10.1093/chemse/bjq033
- 975 Shackman AJ, Fox AS. 2016. Contributions of the central extended amygdala to fear  
976 and anxiety. *J Neurosci* 36:8050–8063. doi:10.1523/JNEUROSCI.0982-16.2016
- 977 Shaham Y, Alvares K, Nespors SM, Grunberg NE. 1992. Effect of stress on oral  
978 morphine and fentanyl self-administration in rats. *Pharmacol Biochem Behav*  
979 41:615–619. doi:10.1016/0091-3057(92)90382-P
- 980 Stamatakis AM, Jennings JH, Ung RL, Blair GA, Weinberg RJ, Neve RL, Boyce F, Mattis  
981 J, Ramakrishnan C, Deisseroth K, Stuber GD. 2013. A Unique Population of  
982 Ventral Tegmental Area Neurons Inhibits the Lateral Habenula to Promote  
983 Reward. *Neuron* 80:1039–1053. doi:10.1016/j.neuron.2013.08.023

- 984 Sucher NJ, Deitcher DL. 1995. PCR and patch-clamp analysis of single neurons.  
985 *Neuron* 14:1095–1100. doi:10.1016/0896-6273(95)90257-0
- 986 Tan KR, Yvon C, Turiault M, Mirzabekov JJ, Doehner J, Labouèbe G, Deisseroth K, Tye  
987 KM, Lüscher C. 2012. GABA Neurons of the VTA Drive Conditioned Place  
988 Aversion. *Neuron* 73:1173–1183. doi:10.1016/j.neuron.2012.02.015
- 989 Taylor SR, Badurek S, Dileone RJ, Nashmi R, Minichiello L, Picciotto MR. 2014.  
990 GABAergic and glutamatergic efferents of the mouse ventral tegmental area. *J*  
991 *Comp Neurol* 522:3308–3334. doi:10.1002/cne.23603
- 992 Uchida K, Otsuka H, Morishita M, Tsukahara S, Sato T, Sakimura K, Itoi K. 2019.  
993 Correction to: Female-biased sexual dimorphism of corticotropin-releasing  
994 factor neurons in the bed nucleus of the stria terminalis (Biology of Sex  
995 Differences (2019) 10 (6) DOI: 10.1186/s13293-019-0221-2). *Biol Sex Differ*  
996 10:1–11. doi:10.1186/s13293-019-0224-z
- 997 Van Zessen R, Phillips JL, Budygin EA, Stuber GD. 2012. Activation of VTA GABA  
998 Neurons Disrupts Reward Consumption. *Neuron* 73:1184–1194.  
999 doi:10.1016/j.neuron.2012.02.016
- 1000 Vashchinkina E, Panhelainen A, Vekovischeva OY, Aitta-Aho T, Ebert B, Ator NA,  
1001 Korpi ER. 2012. GABA site agonist gaboxadol induces addiction-predicting  
1002 persistent changes in ventral tegmental area dopamine neurons but is not  
1003 rewarding in mice or baboons. *J Neurosci* 32:5310–5320.  
1004 doi:10.1523/JNEUROSCI.4697-11.2012
- 1005 Viollet C, Lepousez G, Loudes C, Videau C, Simon A, Epelbaum J. 2008.  
1006 Somatostatinergic systems in brain: Networks and functions. *Mol Cell Endocrinol*  
1007 286:75–87. doi:10.1016/j.mce.2007.09.007
- 1008 Viollet C, Simon A, Tolle V, Labarthe A, Grouselle D, Loe-Mie Y, Simonneau M, Martel

- 1009 G, Epelbaum J. 2017. Somatostatin-IRES-cre mice: Between knockout and wild-  
1010 type? *Front Endocrinol (Lausanne)* 8:1–8. doi:10.3389/fendo.2017.00131
- 1011 Yamaguchi T, Qi J, Wang HL, Zhang S, Morales M. 2015. Glutamatergic and  
1012 dopaminergic neurons in the mouse ventral tegmental area. *Eur J Neurosci*  
1013 41:760–772. doi:10.1111/ejn.12818
- 1014 Yamaguchi T, Wang H-L, Li X, Ng TH, Morales M. 2011. Mesocorticolimbic  
1015 Glutamatergic Pathway. *J Neurosci* 31:8476–8490.  
1016 doi:10.1523/JNEUROSCI.1598-11.2011
- 1017 Yu X, Li W, Ma Y, Tossell K, Harris JJ, Harding EC, Ba W, Miracca G, Wang D, Li L, Guo  
1018 J, Chen M, Li Y, Yustos R, Vyssotski AL, Burdakov D, Yang Q, Dong H, Franks NP,  
1019 Wisden W. 2019. GABA and glutamate neurons in the VTA regulate sleep and  
1020 wakefulness. *Nat Neurosci* 22:106–119. doi:10.1038/s41593-018-0288-9
- 1021 Yu X, Zhao G, Wang D, Wang S, Li R, Li A, Wang H, Nollet M, Chun YY, Zhao T, Yustos  
1022 R, Li H, Zhao J, Li J, Cai M, Vyssotski AL, Li Y, Dong H, Franks NP, Wisden W. 2022.  
1023 A specific circuit in the midbrain detects stress and induces restorative sleep.  
1024 *Science (80- )* 377:63–72. doi:10.1126/science.abn0853
- 1025 Zell V, Steinkellner T, Hollon NG, Warlow SM, Souter E, Faget L, Hunker AC, Jin X,  
1026 Zweifel LS, Hnasko TS. 2020. VTA Glutamate Neuron Activity Drives Positive  
1027 Reinforcement Absent Dopamine Co-release. *Neuron* 107:864-873.e4.  
1028 doi:10.1016/j.neuron.2020.06.011
- 1029
- 1030
- 1031
- 1032

## 1033 Acknowledgements

1034 The following core facilities were essential for the project: Biomedicum Imaging  
1035 Unit of the University of Helsinki; Mouse Behavioural Phenotyping Facility of the  
1036 University of Helsinki, supported by Helsinki Institute of Life Science and Biocenter,  
1037 Finland; Biostatistics Consulting Service of the University of Helsinki; Canadian  
1038 Neurophotonics Platform, Québec, Canada. The authors are grateful for the expert  
1039 technical assistance and fruitful discussion by Heidi Hytönen, Vootele Voikar, Ivan  
1040 Zubarev, Merja Voutilainen, Mikko Airavaara, Lauren van den Broecke and Laura  
1041 Martikainen.

## 1042 Funding

1043 The project was supported by the Academy of Finland (1317399; 330298), the  
1044 Sigrid Juselius Foundation, Otto Malm Foundation and Biomedicum Helsinki  
1045 Foundation. The funders had no role in study design, data collection and  
1046 interpretation, or the decision to submit the work for publication.

## 1047 Author contributions

1048 E.N., A.S., A.M.L. and E.R.K. planned the project. E.N. performed  
1049 electrophysiology, single-cell qPCR, immunohistochemistry (IHC) and imaging for the  
1050 tracing experiments, Intellicage and fear-conditioning (FC) data analysis. A.S. and  
1051 L.V.E. performed intracranial injections, IHC and imaging for caspase and tracing  
1052 experiments. A.S. performed and analyzed all behavioural experiments for caspase  
1053 animal cohorts 1 and 2. A.M.L. planned the breeding of experimental animals and  
1054 performed FC experiments. M.R. performed intracranial injections to CeM. J.U.  
1055 consulted on the qPCR experiments and data analysis. K.E. performed imaging and  
1056 cell counting for caspase experiments. E.N. wrote the first draft of the full

1057 manuscript, all other authors approved the manuscript, with E.N., A.S, A.M.L. and  
1058 E.R.K. writing the final version.

1059

1060 The authors declare no competing interests.

1061

## Supplementary Figures

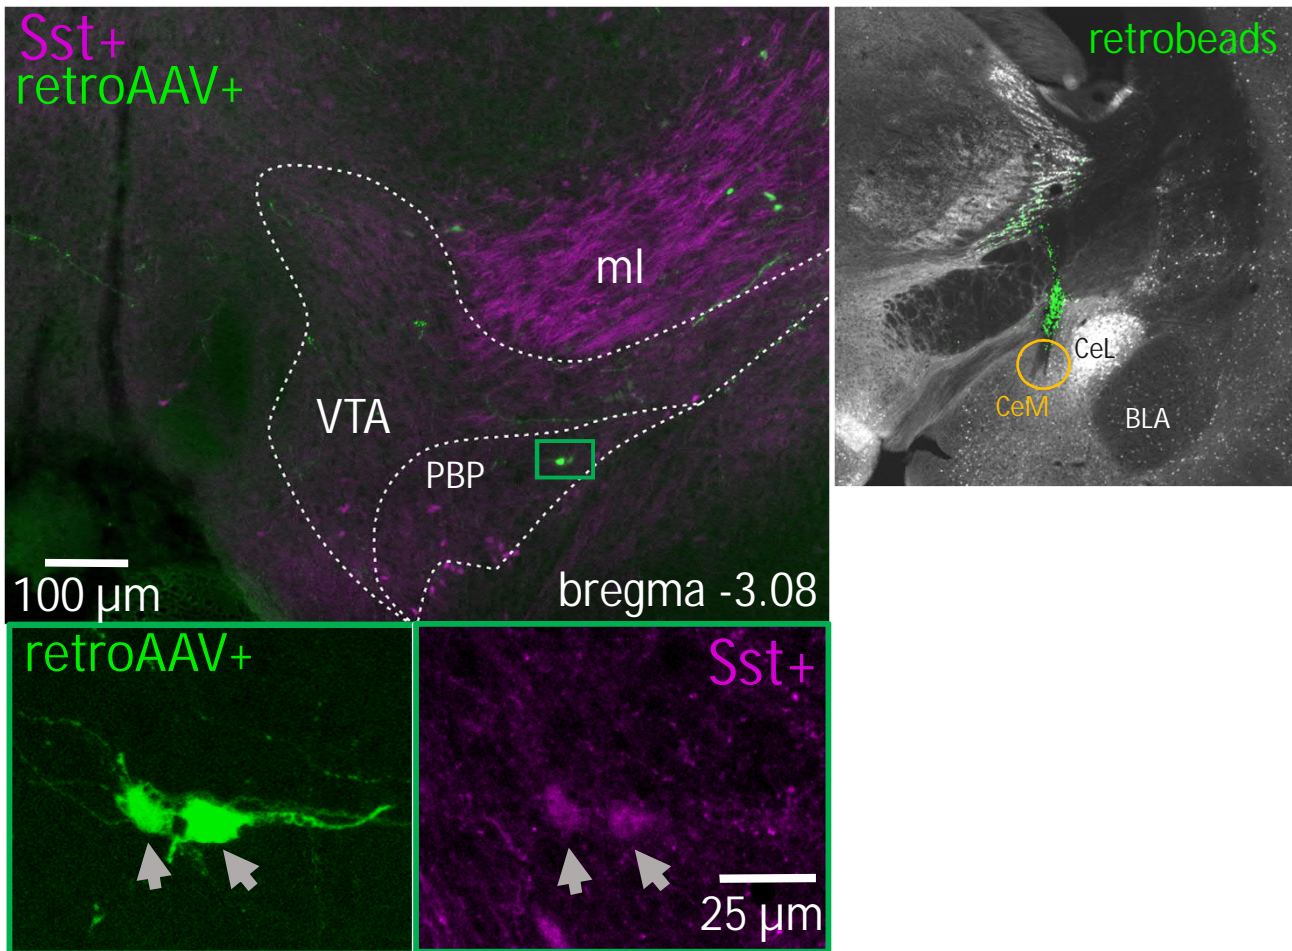

Figure S1. Backtracing from the medial part of the Central Amygdala. Examples of the backtraced neurons in the VTA at the bregma level -3.08 mm in Sst-tdTomato (magenta) mouse. The image on the right shows retrobeads in the injection site (CeM). The yellow circle shows the actual unilateral injection spot. On the top left, the green rectangle shows ipsilaterally traced neurons. The lower panels are the magnified images of the green rectangle. *BLA* – basolateral amygdala; *CeL* – lateral part of the central amygdala; *CeM* – medial part of the central amygdala; *ml* – medial lemniscus; *PBP* – parabrachial pigmented nucleus of the VTA; *VTA* – ventral tegmental area.



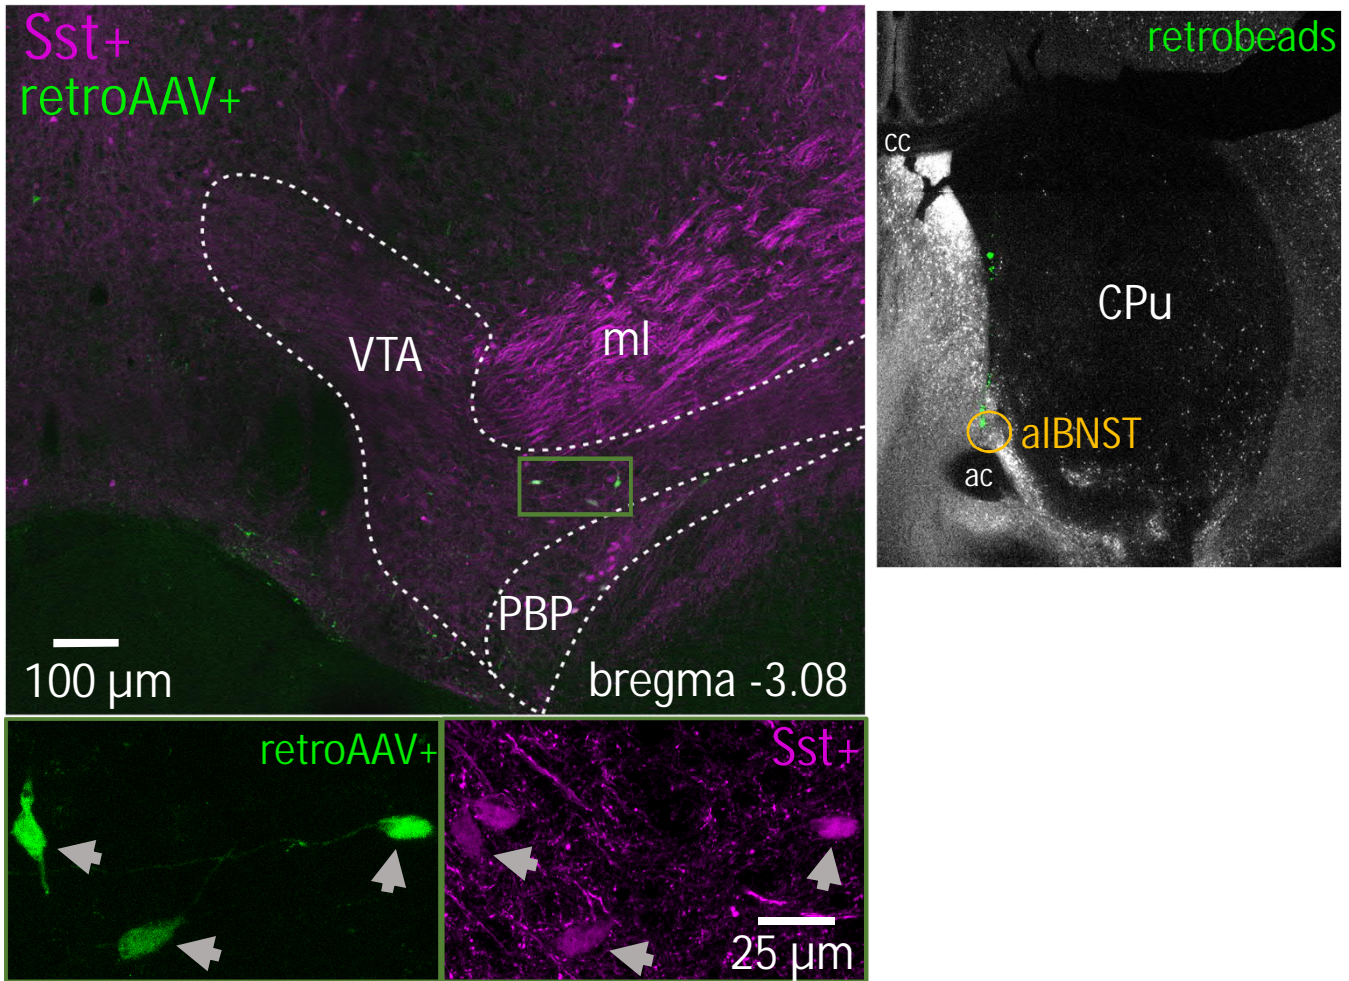

Figure S2. Backtracing from the anterolateral part of the Bed Nucleus of Stria Terminalis. Examples of the backtraced neurons in the VTA at the bregma level -3.08 mm in *Sst*-tdTomato (magenta) mouse. The image on the right shows retrobeads in the injection site (*aIBNST*). The yellow circle shows the actual injection spot. On the top left, the green rectangle shows ipsilaterally traced neurons. Lower panels are magnified images inside green rectangle split by fluorescent channels. *ac* – anterior commissure; *aIBNST* – bed nucleus of the stria terminalis, antero-lateral part; *cc* – corpus callosum; *CPu* – caudatus-putamen (striatum); *ml* – medial lemniscus; *PBP* – parabrachial pigmented nucleus of the VTA; *VTA* – ventral tegmental area.

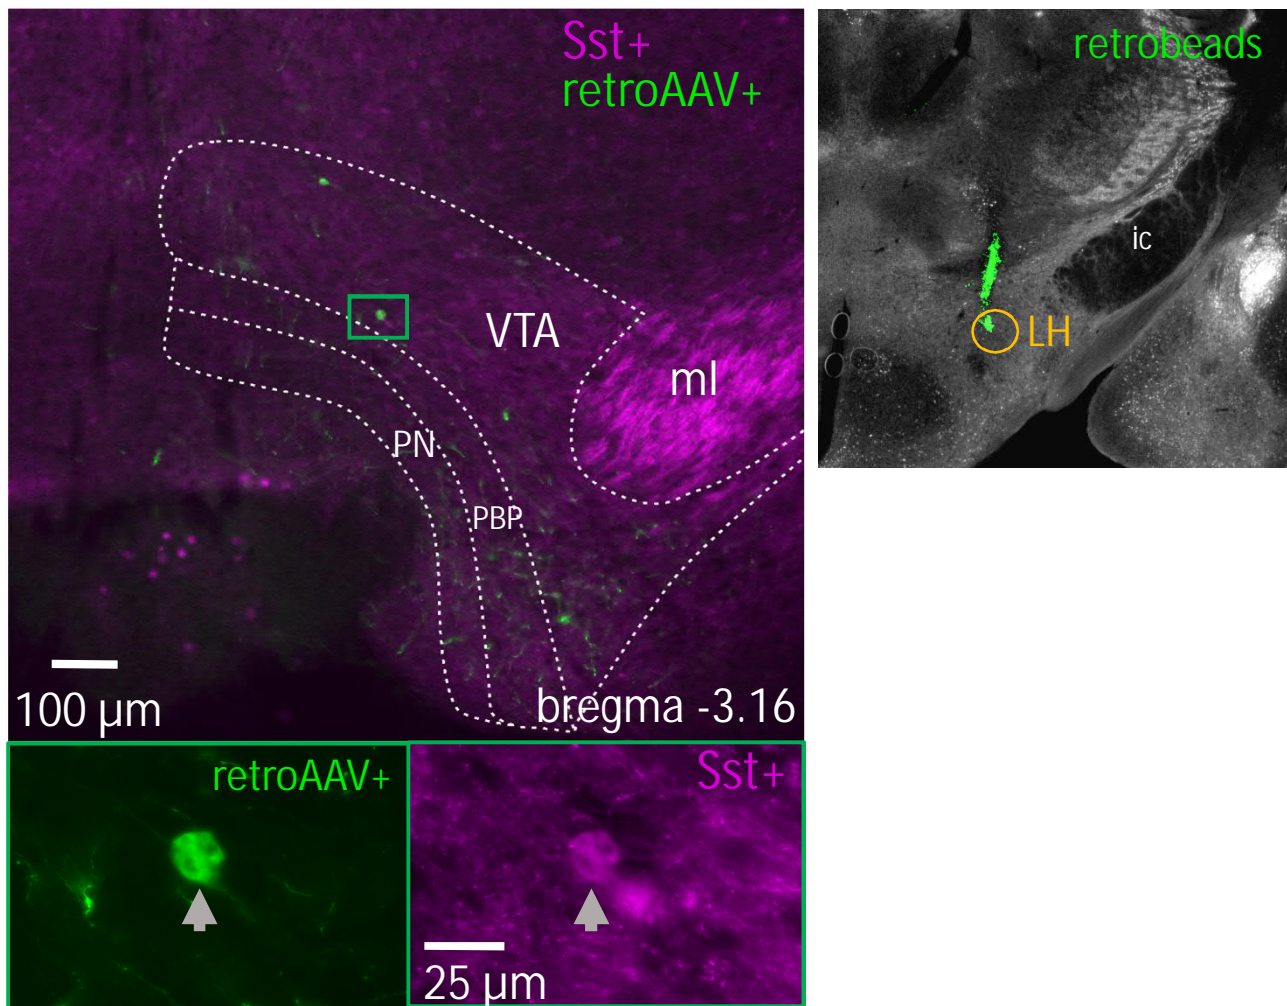



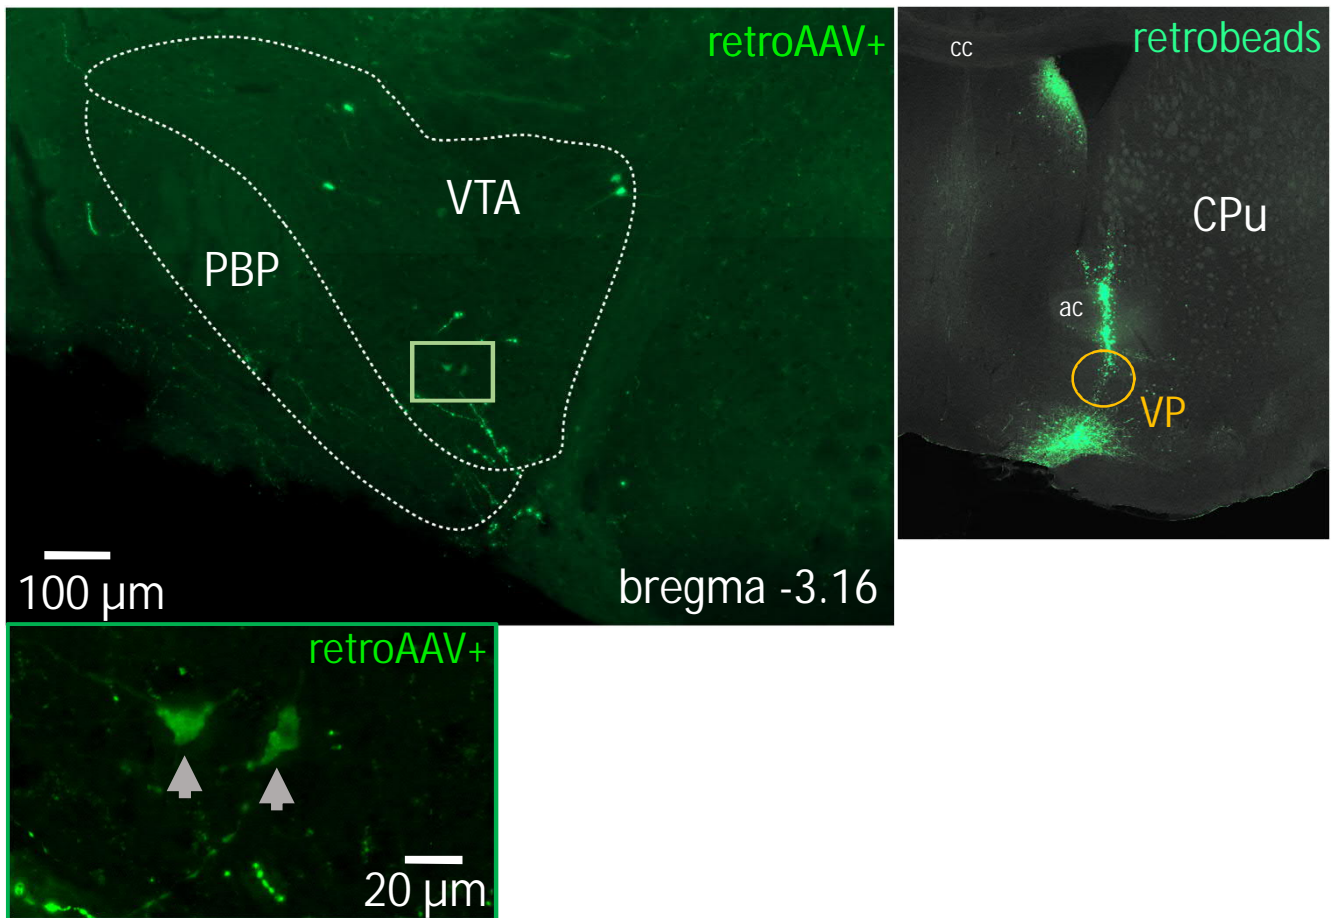

Figure S4. Backtracing from the Ventral Pallidum. Examples of the backtraced neurons in the VTA at the bregma level -3.08 mm in Sst-Cre mouse. The image on the right shows retrobeads in the injection site (VP). The yellow circle shows the actual unilateral injection spot. On the top left, the green rectangle shows ipsilaterally traced neurons. The lower panel is the magnified image of the green rectangle. *ac* – anterior commissure; *cc* – corpus callosum; *CPu* – caudatus-putamen (striatum); *PBP* – parabrachial pigmented nucleus of the VTA; *VP* – ventral pallidum; *VTA* – ventral tegmental area.

**a**

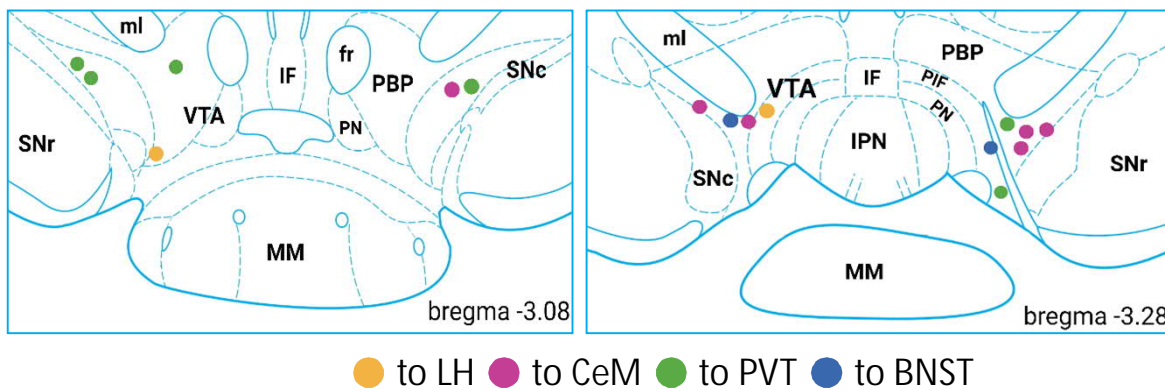

**b**

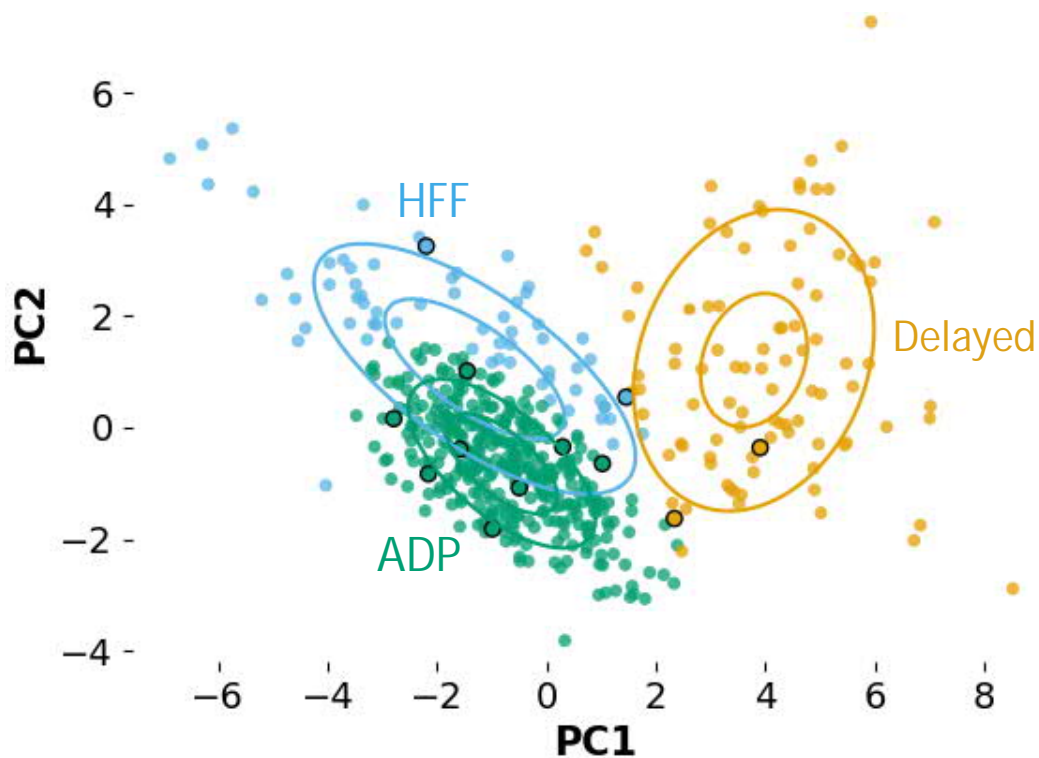

Figure S5. Location of the electrophysiologically recorded VTA Sst neurons projecting to forebrain regions and their electrophysiological subtypes. a. None of the backtraced neurons in electrophysiological experiments were found more posterior than the bregma level -3.28 mm, and most of them were located in the lateral nuclei of the VTA. Their projection sites are colour-coded. b. Most of the recorded backtraced VTA neurons (black-circled) were assigned to the ADP cluster by unsupervised clustering procedure with a previously published dataset of the VTA Sst neurons as the reference. (The method and clusters were described previously in Nagaeva et al., 2020 – see Fig.3). *BNST* – bed nucleus of the stria terminalis; *CeM* – central amygdala, medial part; *LH* – lateral hypothalamus; *PVT* – paraventricular nucleus of the thalamus. ADP – afterdepolarizing, HFF – high-frequency firing.

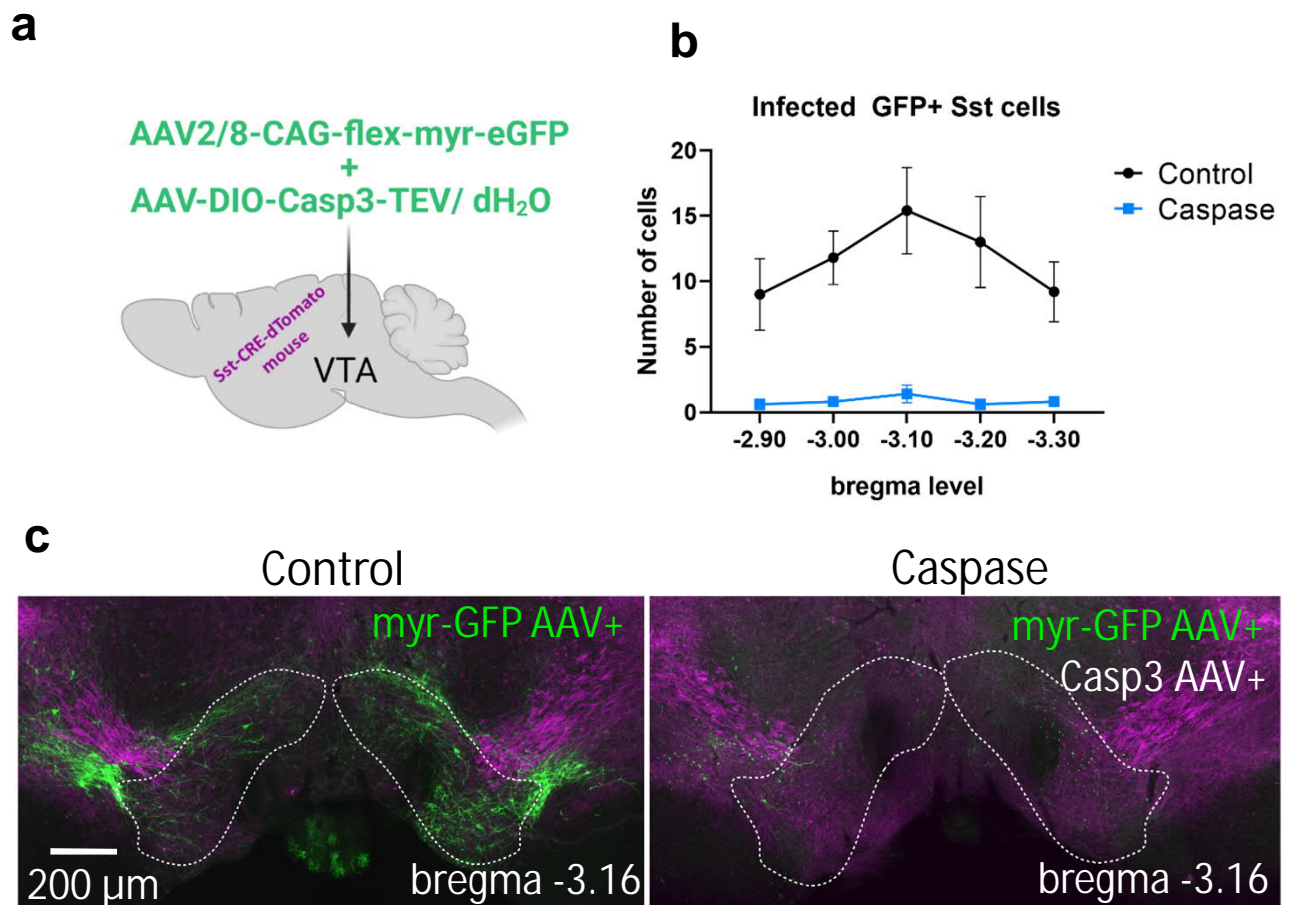

Figure S6. Deletion of the VTA Sst neurons with caspase 3 expressing virus. a. Scheme of the bilateral intra-VTA viral injections to Sst-tdTomato (magenta) mice. The control group received only myr-eGFP virus diluted with dH<sub>2</sub>O to adjust the final volume. b. The graph shows an average number of GFP+ Sst cell bodies in the control and caspase-treated animals (n=5 animals per group) depicted per bregma level (X-axis). c. Example images of the mouse coronal VTA section from the control (on the left) and caspase group (on the right). The caspase image has almost no infected GFP+ cell bodies in the VTA region (outlined with a white dashed line), showing only sparse GFP+ neurite fragments of the dead Sst neurons.

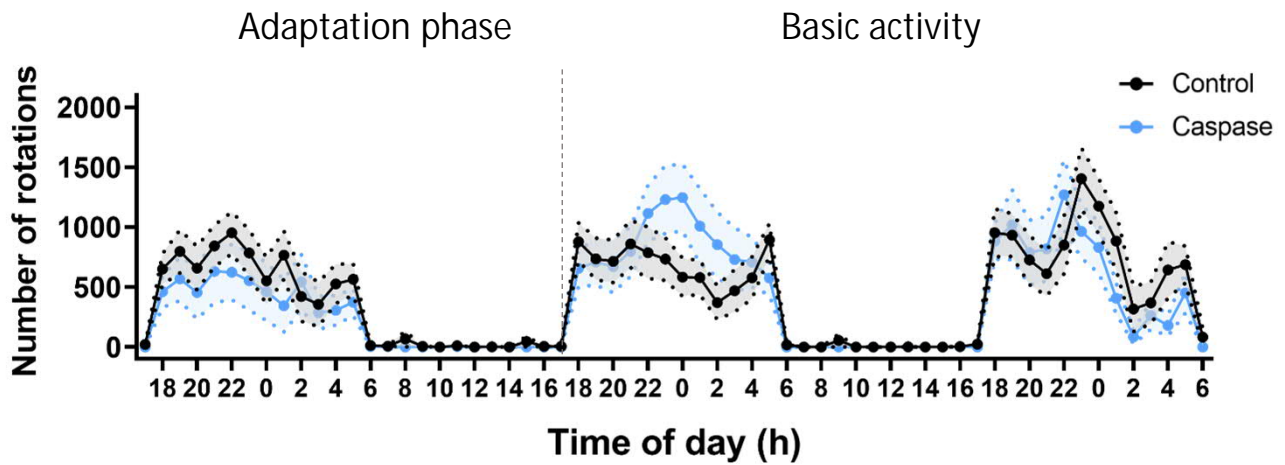

Figure S7. Deletion of VTA Sst neurons did not affect circadian activity in the free-running wheel test (lights on 6-18). Activity of the control (black) and VTA<sup>Sst</sup>-caspase (blue) mice. There were no differences in the number of rotations between the treatment groups across three days (treatment:  $F(1,24)=0.202$ ,  $p=0.657$ ; treatment x time:  $F(67,1608)=1.230$ ,  $p=0.278$ ). Data are shown as means  $\pm$  SEM.



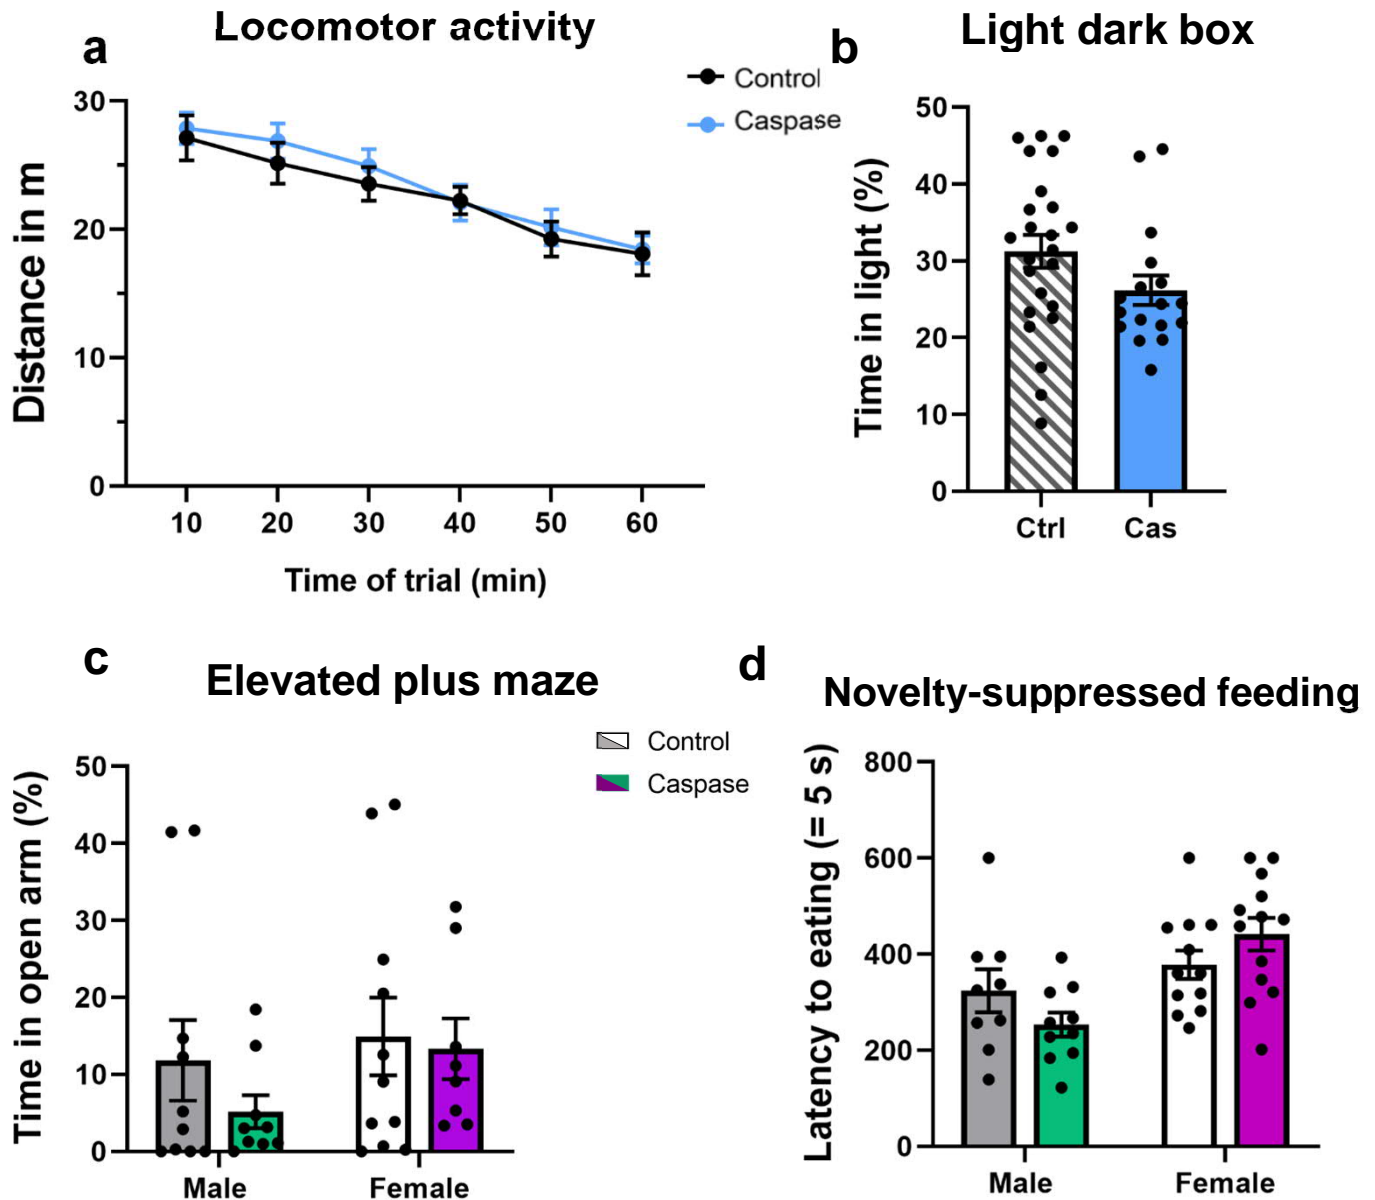

Figure S8. Deletion of Sst neurons in the VTA had no effect on locomotor activity or anxiety-like behaviour. a. Locomotor activity in the open arena was not different between the VTA<sup>Sst</sup>-caspase and control mice ( $F(1,34) = 0.265$ ,  $p = 0.61$ ). b. The light-dark box test did not show any difference in percentage of time spent in the light compartment between the treatment groups ( $F(1,34) = 1.750$ ,  $p = 0.195$ , sex  $F(1,34) = 3.957$ ,  $p = 0.055$ ). c. Similarly, percentage of time spent in the open arm measured in the elevated plus maze test was not different. d. Latency to start eating in a novel environment did not show a difference, albeit a marginal significance for sex-dependent effects was detected in the VTA<sup>Sst</sup>-caspase mice (treatment x sex:  $F(1,34) = 3.862$ ,  $p = 0.058$ ). Data are shown as mean  $\pm$  SEM.

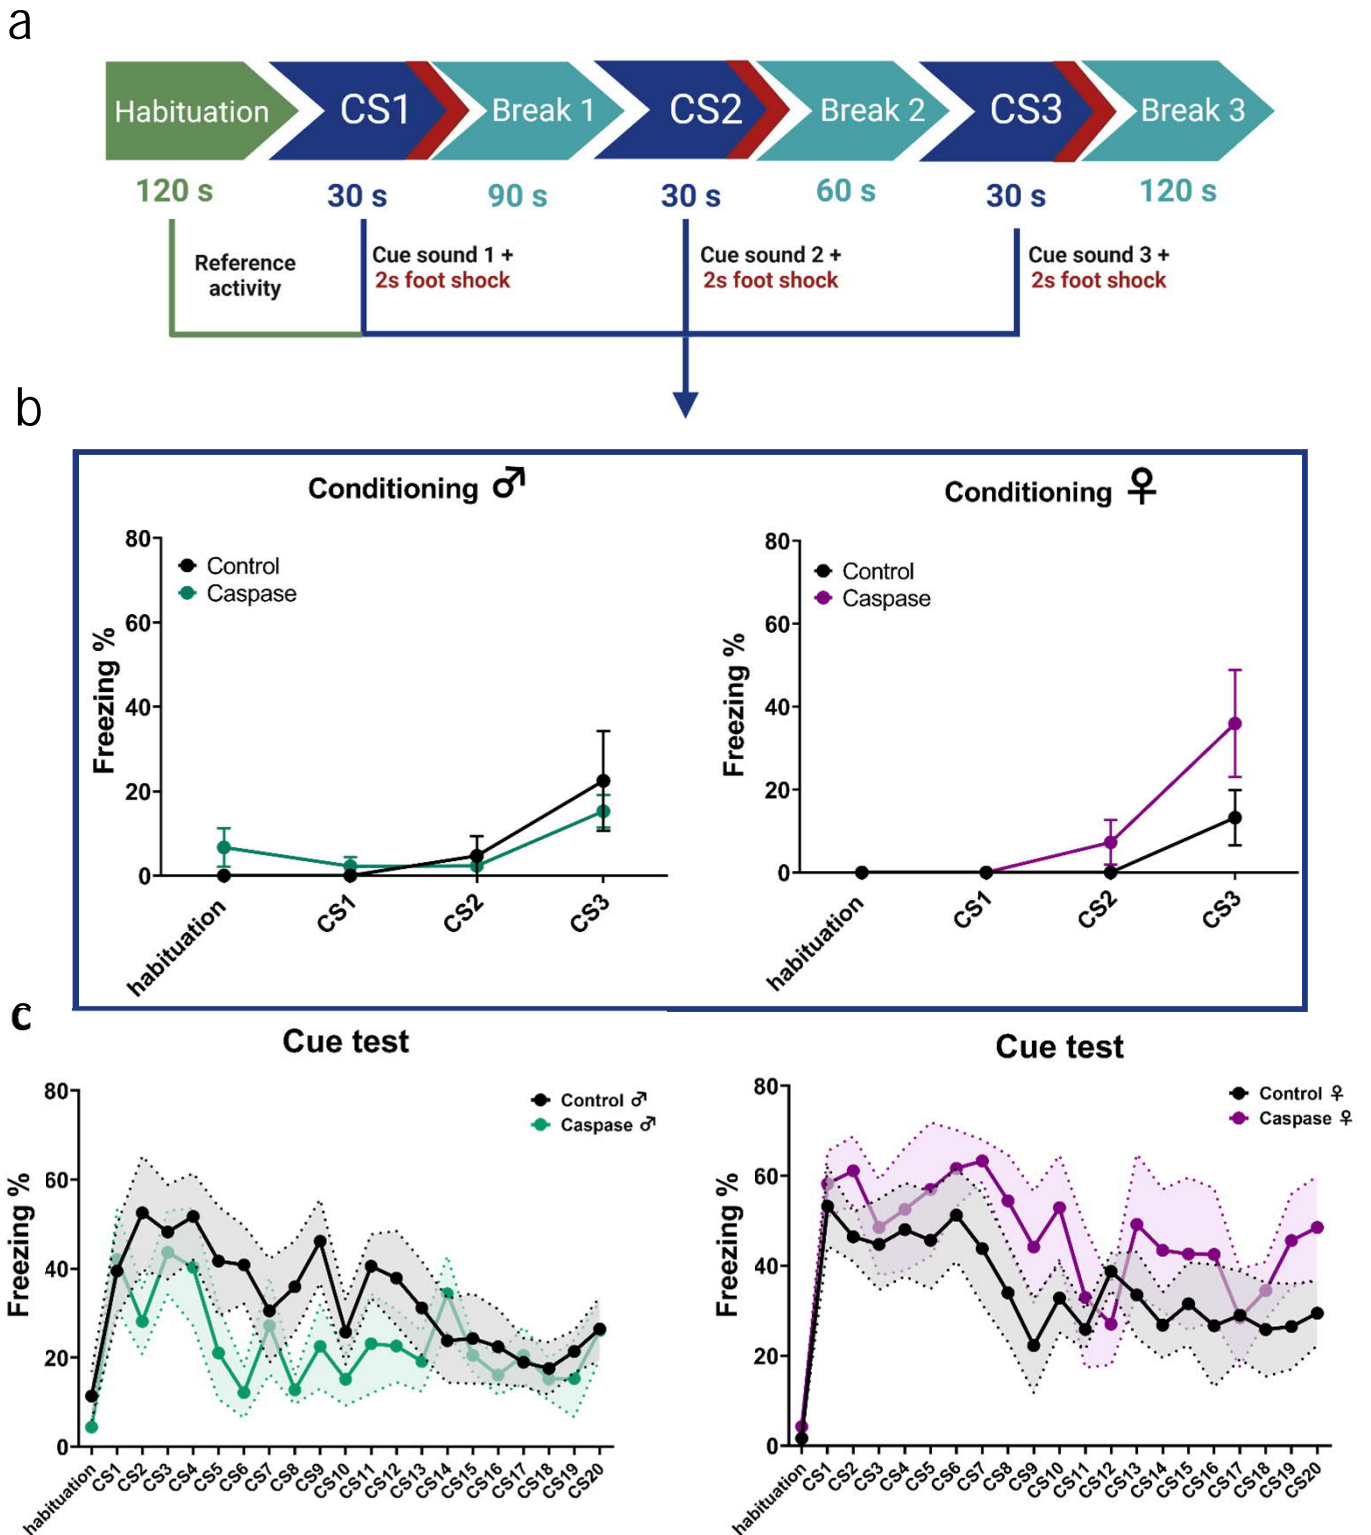

Figure S9. Deletion of the VTA Sst neurons did not affect cue-induced fear processing in Pavlovian fear conditioning. **a**. Protocol of fear conditioning during the acquisition phase. **b**. Graphs show per cent freezing (freeze time/total time) during 30-s cue-sound presentations, co-terminated with 2-s foot shocks. There was no difference in freezing between sexes ( $F(1,19)=0.019$ ,  $p=0.891$ ) or between treatments ( $F(1,19)=2.182$ ,  $p=0.156$ ). **c**. Similarly, there were no significant difference in rates of cue-associated fear memory retrieval or extinction (cue x sex x treatment:  $F(1,420)=1.04$ ,  $p=0.413$ ).

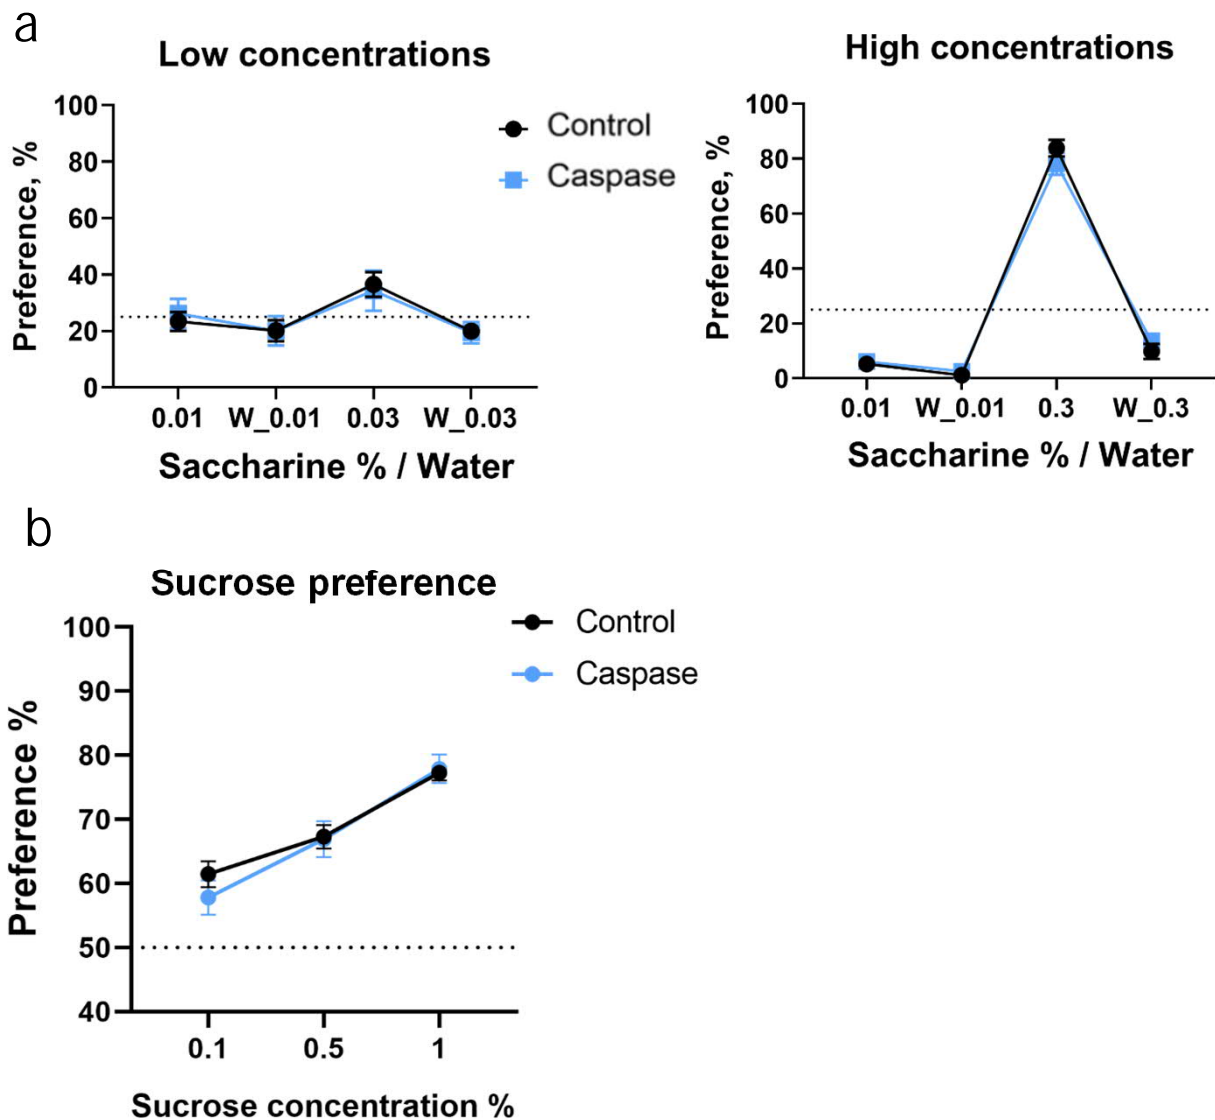

Figure S10. Deletion of the VTA Sst neurons did not affect natural reward preference or sensitivity. Graphs show preference in % (number of licks to a certain bottle/number of total licks, Y-axis) to different saccharine concentrations over water (X-axis). a. Preference to different saccharine concentrations or water in the corresponding corner in the Intellicage system did not reveal any significant differences between the treatment groups for low saccharine concentrations ( $F(1,24)=0.698$ ,  $p=0.413$ ) or to high ones ( $F(1,24)=0.045$ ,  $p=0.834$ ). The dashed line shows a 25% preference rate. b. Similarly, sucrose preference in the two-bottle choice test in individual cages did not reveal any differences (concentration x treatment:  $F(2,66) = 0.362$ ,  $p = 0.688$ ). The dashed line shows a 50% preference rate. Data are shown as mean  $\pm$  SEM.

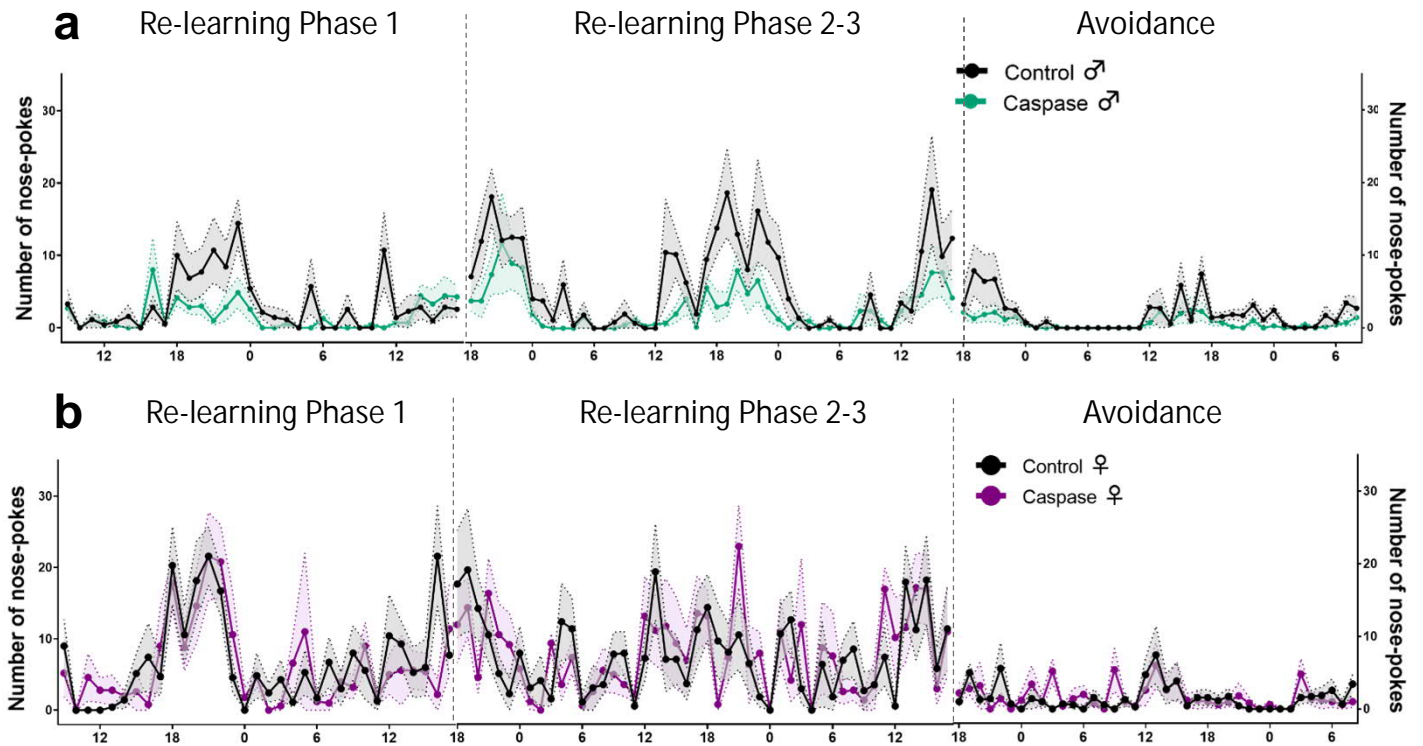

Figure S11. Re-learning new rules in control and caspase mice and introduction of air-puffs in the reward-related task. The X-axis shows the number of nose-pokes to the saccharine bottles per hour, Y-axis shows daily hours (lights on 6-18). a. Nose-poking dynamics in male mice. Although there was a clear tendency in  $VTA^{Sst}$ -caspase male mice to be less active in nose-poking to the saccharine corner in all phases of the re-learning-avoidance test, no statistically significant differences were detected between the groups (see Table S1). b. Nose-poking dynamics in female mice showed no differences between the groups.

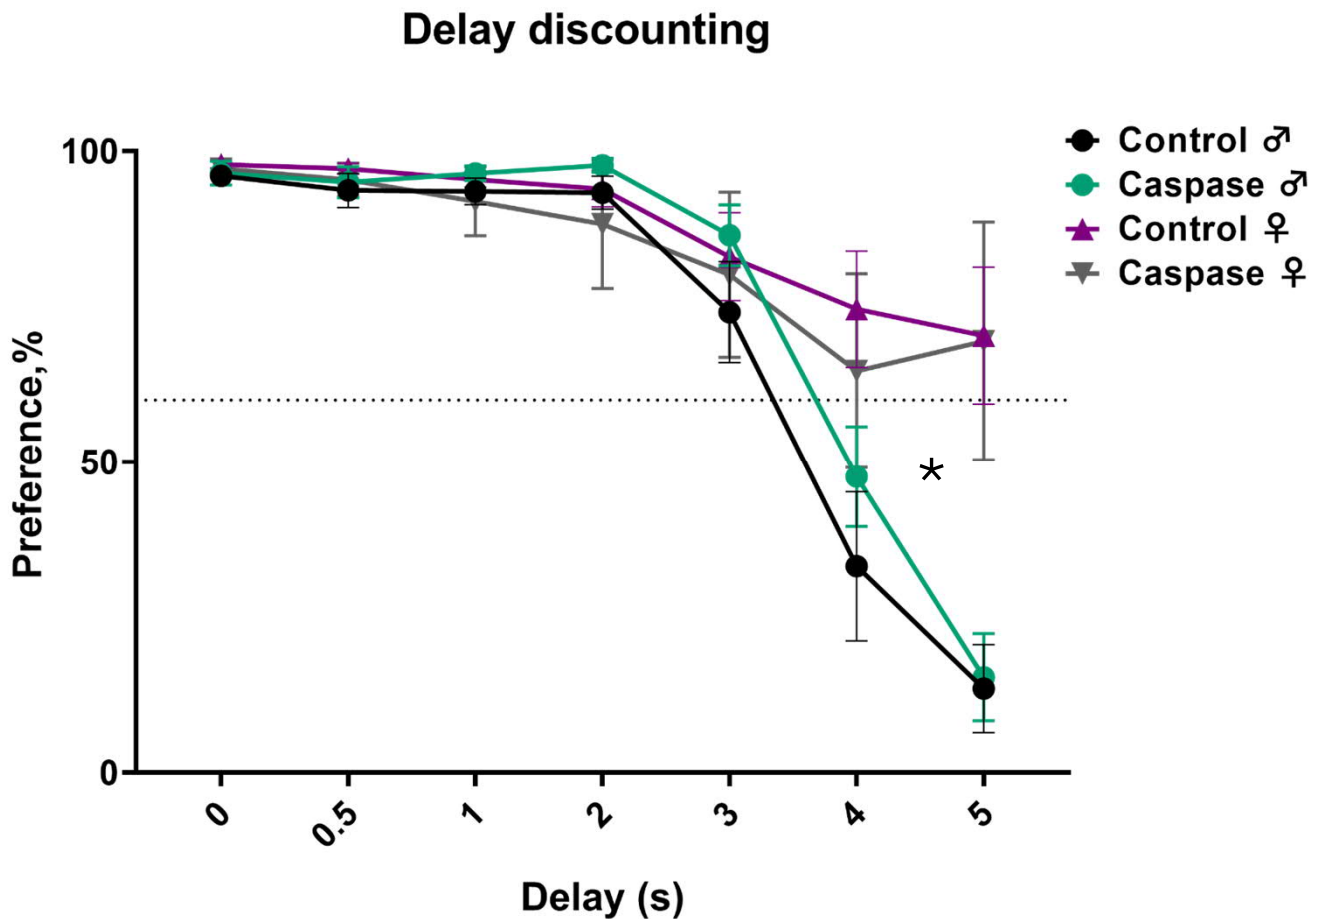

Figure S12. Deletion of the VTA Sst neurons did not influence the impulsivity or readiness to wait for the saccharine reward. Y-axis indicates preference in % for 0.3% saccharine over water defined as a lick number to the saccharine bottle/total number of licks. The X-axis indicates the duration of the delay before the saccharine door opened after a mouse entered the corner. \* indicates the significance of the differences between the sexes ( $F(1,22)=5.829$ ,  $p=0.024$ ) and of the sex x delay interaction ( $F(6,132)=17.09$ ,  $p<0.0001$ ).

Intelligence

Supplementary Table 1

| Home cage activity             |                |                |           |      |                        |             |
|--------------------------------|----------------|----------------|-----------|------|------------------------|-------------|
| <i>Number of nose-pokes</i>    |                |                |           |      |                        |             |
|                                |                |                |           |      | RM - repeated measures |             |
| Adaptation (14 hours)          | RM-2 way ANOVA | F              | p value   |      | post-hoc               |             |
|                                | Sex            | F(1,22)=24.45  | <0.001    | **** | males                  | females     |
|                                | Treatment      | F(1,22)=4.543  | 0.044 *   |      | 0.698 ns               | 0.004 ***   |
|                                | Sex*Treatment  | F(1,22)=7.085  | 0.014 *   |      |                        |             |
| Day 2 (24 hours)               | RM-2 way ANOVA | F              | p value   |      | post-hoc               |             |
|                                | Sex            | F(1,22)=5.751  | 0.025 *   |      | males                  | females     |
|                                | Treatment      | F(1,22)=2.770  | 0.11 ns   |      | 0.647 ns               | 0.03 **     |
|                                | Sex*Treatment  | F(1,22)=3.133  | 0.091 ns  |      |                        |             |
| Day 3 (24 hours)               | RM-2 way ANOVA | F              | p value   |      | post-hoc               |             |
|                                | Sex            | F(1,22)=18.315 | <0.001    | **** | males                  | females     |
|                                | Treatment      | F(1,22)=4.884  | 0.038 *   |      | 0.647 ns               | 0.002 **    |
|                                | Sex*Treatment  | F(1,22)=8.043  | 0.01 *    |      |                        |             |
| All 3 days (62 hours)          | RM-2 way ANOVA | F              | p value   |      | post-hoc               |             |
|                                | Sex            | F(1,22)=27.329 | <0.001    | **** | males                  | females     |
|                                | Treatment      | F(1,22)=7.409  | 0.012 *   |      | 0.695 ns               | <0.001 **** |
|                                | Sex*Treatment  | F(1,22)=10.618 | 0.004 **  |      |                        |             |
| <i>Number of corner visits</i> |                |                |           |      |                        |             |
| Adaptation (14 hours)          | RM-2 way ANOVA | F              | p value   |      | post-hoc               |             |
|                                | Sex            | F(1,22)=4.53   | 0.045 *   |      | males                  | females     |
|                                | Treatment      | F(1,22)=2.131  | 0.158 ns  |      | 0.892 ns               | 0.047 *     |
|                                | Sex*Treatment  | F(1,22)=2.707  | 0.114 ns  |      |                        |             |
| Day 2 (24 hours)               | RM-2 way ANOVA | F              | p value   |      | post-hoc               |             |
|                                | Sex            | F(1,22)=0.013  | 0.909 ns  |      | males                  | females     |
|                                | Treatment      | F(1,22)=0.069  | 0.795 ns  |      | 0.388 ns               | 0.258 ns    |
|                                | Sex*Treatment  | F(1,22)=2.104  | 0.161 ns  |      |                        |             |
| Day 3 (24 hours)               | RM-2 way ANOVA | F              | p value   |      | post-hoc               |             |
|                                | Sex            | F(1,22)=13.796 | 0.001 *** |      | males                  | females     |
|                                | Treatment      | F(1,22)=1.443  | 0.242 ns  |      | 0.798 ns               | 0.076 ns    |
|                                | Sex*Treatment  | F(1,22)=2.406  | 0.135 ns  |      |                        |             |
| All 3 days (62 hours)          | RM-2 way ANOVA | F              | p value   |      | post-hoc               |             |
|                                | Sex            | F(1,22)=5.758  | 0.025 *   |      | males                  | females     |
|                                | Treatment      | F(1,22)=0.182  | 0.182 ns  |      | 0.574 ns               | 0.026 *     |
|                                | Sex*Treatment  | F(1,22)=4.62   | 0.043 *   |      |                        |             |
| <i>Number of licks</i>         |                |                |           |      |                        |             |
| Adaptation (14 hours)          | RM-2 way ANOVA | F              | p value   |      | post-hoc               |             |
|                                | Sex            | F(1,22)=22.97  | <0.001    | **** | males                  | females     |
|                                | Treatment      | F(1,22)=0.633  | 0.435 ns  |      | 0.605 ns               | 0.556 ns    |
|                                | Sex*Treatment  | F(1,22)=0.008  | 0.931 ns  |      |                        |             |
| Day 2 (24 hours)               | RM-2 way ANOVA | F              | p value   |      | post-hoc               |             |
|                                | Sex            | F(1,22)=0.001  | 0.97 ns   |      | males                  | females     |
|                                | Treatment      | F(1,22)=0.709  | 0.409 ns  |      | 0.388 ns               | 0.258 ns    |
|                                | Sex*Treatment  | F(1,22)=0.272  | 0.608 ns  |      |                        |             |
| Day 3 (24 hours)               | RM-2 way ANOVA | F              | p value   |      | post-hoc               |             |
|                                | Sex            | F(1,22)=1.716  | 0.204 ns  |      | males                  | females     |
|                                | Treatment      | F(1,22)=1.802  | 0.193 ns  |      | 0.578 ns               | 0.206 ns    |
|                                | Sex*Treatment  | F(1,22)=0.339  | 0.567 ns  |      |                        |             |
| All 3 days (62 hours)          | RM-2 way ANOVA | F              | p value   |      | post-hoc               |             |
|                                | Sex            | F(1,22)=2.046  | 0.167 ns  |      | males                  | females     |
|                                | Treatment      | F(1,22)=1.390  | 0.251 ns  |      | 0.647 ns               | 0.253 ns    |
|                                | Sex*Treatment  | F(1,22)=0.307  | 0.585 ns  |      |                        |             |

Conclusion: caspase animals overall nose poke more, but do not drink more (number of licks)  
 only caspase females significantly nosepoke and visit corners more than control females  
 no significant difference in males between the treatment groups



Supplementary Table 1

| Delay discounting                           |                |        |             |
|---------------------------------------------|----------------|--------|-------------|
| <i>Number of licks to saccharine bottle</i> |                |        |             |
|                                             | RM-2 way ANOVA | F      | p value     |
| Sex                                         | F(1,22)        | =5.889 | 0.0239 *    |
| Treatment                                   | F(1,22)        | =0.032 | 0.859 ns    |
| Sex*Treatment                               | F(1,22)        | =0.836 | 0.37 ns     |
| Sex*Delay                                   | F(6,132)       | =17.09 | <0.001 **** |

Conclusion: no significant difference between Treatment groups of both sexes  
males are ready to wait saccharine less time than females

| Saccharine learning and unlearning (number of nose pokes) |                |         |         |        |          |       |         |
|-----------------------------------------------------------|----------------|---------|---------|--------|----------|-------|---------|
| Adaptation                                                | RM-2 way ANOVA | F       |         |        |          |       |         |
|                                                           | Sex            | F(1,22) | =23.854 | <0.001 | ****     |       |         |
|                                                           | Treatment      | F(1,22) | =1.217  | 0.282  | ns       |       |         |
|                                                           | Sex*Treatment  | F(1,22) | =0.417  | 0.525  | ns       |       |         |
| Basic activity                                            | RM-2 way ANOVA | F       |         |        |          |       |         |
|                                                           | Sex            | F(1,22) | =53.712 | <0.001 | ****     |       |         |
|                                                           | Treatment      | F(1,22) | =1.345  | 0.259  | ns       |       |         |
|                                                           | Sex*Treatment  | F(1,22) | =2.094  | 0.162  | ns       |       |         |
| Unlearning<br>"prediction error"                          | RM-2 way ANOVA | F       |         |        | post-hoc |       |         |
|                                                           | Sex            | F(1,22) | =33.575 | <0.001 | ****     | males | females |
|                                                           | Treatment      | F(1,22) | =0.522  | 0.478  | ns       | 0.3   | ns      |
|                                                           | Sex*Treatment  | F(1,22) | =4.635  | 0.043  | *        |       |         |

Conclusion: females are more active than males in both treatment groups  
Caspase females have a tendency to unlearn slower than the control female group but it is not significant

| Saccharine re-learning and avoidance (number of nose pokes) |                |         |         |        |          |       |         |
|-------------------------------------------------------------|----------------|---------|---------|--------|----------|-------|---------|
| Adaptation<br>("re-learning")                               | RM-2 way ANOVA | F       |         |        | post-hoc |       |         |
|                                                             | Sex            | F(1,22) | =11.964 | <0.001 | ****     | males | females |
|                                                             | Treatment      | F(1,22) | =1.547  | 0.227  | ns       | 0.193 | ns      |
|                                                             | Sex*Treatment  | F(1,22) | =0.323  | 0.576  | ns       |       |         |
| Basic activity                                              | RM-2 way ANOVA | F       |         |        | post-hoc |       |         |
|                                                             | Sex            | F(1,22) | =8.298  | 0.009  | **       | males | females |
|                                                             | Treatment      | F(1,22) | =2.082  | 0.163  | ns       | 0.034 | *       |
|                                                             | Sex*Treatment  | F(1,22) | =2.557  | 0.124  | ns       |       |         |
| Avoidance<br>"air-puffs" introduced                         | RM-2 way ANOVA | F       |         |        | post-hoc |       |         |
|                                                             | Sex            | F(1,22) | =0.617  | 0.441  | ns       | males | females |
|                                                             | Treatment      | F(1,22) | =1.939  | 0.178  | ns       | 0.03  | *       |
|                                                             | Sex*Treatment  | F(1,22) | =3.026  | 0.096  | ns       |       |         |
| Full dynamics                                               | RM-2 way ANOVA | F       |         |        | post-hoc |       |         |
|                                                             | Sex            | F(1,22) | =11.964 | 0.002  | **       | males | females |
|                                                             | Treatment      | F(1,22) | =2.069  | 0.164  | ns       | 0.047 | *       |
|                                                             | Sex*Treatment  | F(1,22) | =1.975  | 0.174  | ns       |       |         |

Conclusion: females are more active than males in both treatment groups, but not after the air-puffs were introduced  
No differences in the re-learning or avoidance rates between treatment groups.

## FEAR CONDITIONING

## Supplementary Table 2

| FEAR ACQUISITION (conditioning)      |                                                      |                 |                     |                           |                     |
|--------------------------------------|------------------------------------------------------|-----------------|---------------------|---------------------------|---------------------|
| pcnt freezing (PF)                   | RM-2 way ANOVA                                       | F               | p value             | post-hoc                  | post-hoc            |
|                                      | Sex                                                  | F(1,19)=0.14    | 0.906 ns            | males                     | females             |
|                                      | Treatment                                            | F(1,19)=0.499   | 0.488 ns            | 0.071 ns                  | 0.017 *             |
|                                      | Sex*Treatment                                        | F(1,19)=10.459  | 0.004 **            | tendency that             | caspace freeze more |
|                                      | Point*Sex*Treatment                                  | F(6,114)=4.046  | 0.012 *             | caspace freeze less       |                     |
| freezing episodes (FE)               | RM-2 way ANOVA                                       | F               | p value             | RM - repeated measures    |                     |
|                                      | Sex                                                  | F(1,19)=0.951   | 0.342 ns            |                           |                     |
|                                      | Treatment                                            | F(1,19)=0.419   | 0.525 ns            | <i>no within Sexes</i>    |                     |
|                                      | Sex*Treatment                                        | F(1,19)=5.159   | 0.035 *             |                           |                     |
|                                      | PF aquisition only BREAKS<br>pcnt freezing           | RM-2 way ANOVA  | F                   | p value                   | post-hoc            |
| Sex                                  | F(1,19)=0.028                                        | 0.869 ns        | males               | females                   |                     |
| Treatment                            | F(1,19)=0.033                                        | 0.857 ns        | 0.036 *             | 0.038 *                   |                     |
| Sex*Treatment                        | F(1,19)=9.971                                        | 0.005 **        | caspace freeze less | caspace freeze more       |                     |
| FE aquisition only BREAKS            | RM-2 way ANOVA                                       | F               | p value             |                           |                     |
|                                      | Sex                                                  | F(1,19)=1.368   | 0.257 ns            |                           |                     |
|                                      | Treatment                                            | F(1,19)=0.120   | 0.733 ns            | <i>no within Sexes</i>    |                     |
|                                      | Sex*Treatment                                        | F(1,19)=4.828   | 0.041 *             |                           |                     |
|                                      | <i>No difference in only Cue Sounds (CS) periods</i> |                 |                     |                           |                     |
| pcnt freezing                        | RM-2 way ANOVA                                       | F               | p value             |                           |                     |
|                                      | Sex                                                  | F(1,19)=0.019   | 0.891 ns            |                           |                     |
|                                      | Treatment                                            | F(1,19)=2.182   | 0.156 ns            |                           |                     |
|                                      | Sex*Treatment                                        | F(1,19)=2.390   | 0.139 ns            |                           |                     |
|                                      | CONTEXT RETRIEVAL 9 DAYS AFTER                       |                 |                     |                           |                     |
| pcnt freezing (PF)                   | 2 way ANOVA                                          | F               | p value             | post-hoc                  | post-hoc            |
|                                      | Sex                                                  | F(1,21)=1.191   | 0.288 ns            | males                     | females             |
|                                      | Treatment                                            | F(1,21)=0.18    | 0.894 ns            | 0.08 ns                   | 0.086 ns            |
|                                      | Sex*Treatment                                        | F(1,21)=6.602   | 0.018 *             |                           |                     |
|                                      | Freezing episodes (FE)                               | 2 way ANOVA     | F                   | p value                   | post-hoc            |
| Sex                                  |                                                      | F(1,21)=0.25    | 0.876 ns            | males                     | females             |
| Treatment                            |                                                      | F(1,21)=3.269   | 0.085 ns            | 0.622 ns                  | 0.01 *              |
| Sex*Treatment                        |                                                      | F(1,21)=6.102   | 0.022 *             | caspace freeze more often |                     |
| CUE-INDUCED RETRIEVAL AND EXTINCTION |                                                      |                 |                     |                           |                     |
|                                      | RM-2 way ANOVA                                       | F               | p value             |                           |                     |
|                                      | Sex                                                  | F(1,21)=4.156   | 0.54 ns             |                           |                     |
|                                      | Treatment                                            | F(1,21)=0.322   | 0.577 ns            |                           |                     |
|                                      | Sex*Treatment                                        | F(1,21)=1.823   | 0.191 ns            |                           |                     |
|                                      | Cue*Treatment                                        | F(20,420)=0.78  | 0.642 ns            |                           |                     |
|                                      | Cue*Sex*Treatment                                    | F(20,420)=1.040 | 0.41 ns             |                           |                     |
| <i>no difference in CS retrieval</i> |                                                      |                 |                     |                           |                     |

OTHER BEHAVIOURAL TESTS

Supplementary Table 3

| NOVELTY-INDUCED LOCOMOTION (60 min)                       |                    |                    |         |    |
|-----------------------------------------------------------|--------------------|--------------------|---------|----|
| Distanced moved<br>10 min bins                            | RM-2 way ANOVA     | F                  | p-value |    |
|                                                           | Treatment          | F(1,34) = 0.265    | 0.61    | ns |
|                                                           | Treatment*sex      | F(1,34) = 0.203    | 0.655   | ns |
|                                                           | Treatment*time     | F(5,170) = 0.43    | 0.782   | ns |
| <i>No difference</i>                                      |                    |                    |         |    |
| RM - repeated measures                                    |                    |                    |         |    |
| LIGHT-DARK BOX TEST                                       |                    |                    |         |    |
| Time spent in light (%)                                   | 2 way ANOVA        | F                  | p-value |    |
|                                                           | Sex                | F(1,34) = 3.957    | 0.055   | ns |
|                                                           | Treatment          | F(1,34) = 1.75     | 0.195   | ns |
|                                                           | Treatment*sex      | F(1,34) = 0.704    | 0.407   | ns |
| <i>No difference</i>                                      |                    |                    |         |    |
| ELEVATED PLUS MAZE                                        |                    |                    |         |    |
| Time spent in open arm (%)                                | RM-2 way ANOVA     | F                  | p-value |    |
|                                                           | Sex                | F(1,34) = 2.656    | 0.112   | ns |
|                                                           | Treatment          | F(1,34) = 0.072    | 0.79    | ns |
|                                                           | Treatment*sex      | F(1,34) = 0.394    | 0.534   | ns |
| <i>No difference</i>                                      |                    |                    |         |    |
| RUNNING WHEEL (RW) ACTIVITY                               |                    |                    |         |    |
| 3 Days activity                                           | RM-2 way ANOVA     | F                  | p-value |    |
|                                                           | Sex                | F(1,24) = 1.470    | 0.237   | ns |
|                                                           | Treatment          | F(1,24) = 0.202    | 0.657   | ns |
|                                                           | Treatment*sex      | F(1,24) = 1.574    | 0.222   | ns |
|                                                           | Treatment*time     | F(67,1608) = 1.230 | 0.278   | ns |
|                                                           | Treatment*time*sex | F(67,1608) = 0.729 | 0.683   | ns |
| <i>No difference</i>                                      |                    |                    |         |    |
| NOVELTY-SUPPRESSED FEEDING                                |                    |                    |         |    |
| Latency to eating                                         | 2 way ANOVA        | F                  | p-value |    |
|                                                           | Sex                | F(1,34) = 0.543    | 0.47    | ns |
|                                                           | Treatment          | F(1,34) = 0.029    | 0.865   | ns |
|                                                           | Treatment * sex    | F(1,34) = 3.862    | 0.058   | ns |
| <i>No difference</i>                                      |                    |                    |         |    |
| FORCED SWIM TEST                                          |                    |                    |         |    |
| Latency to immobilization                                 | 2 way ANOVA        | F                  | p-value |    |
|                                                           | Sex                | F(1,34) = 0.33     | 0.858   | ns |
|                                                           | Treatment          | F(1,34) = 5.08     | 0.031   | *  |
|                                                           | Treatment * sex    | F(1,34) = 0.989    | 0.327   | ns |
| <i>Caspase display longer latency to first immobility</i> |                    |                    |         |    |
| Duration of immobilization<br>2 min bins                  | RM-2 way ANOVA     | F                  | p-value |    |
|                                                           | Sex                | F(1,34) = 0.611    | 0.611   | ns |
|                                                           | Treatment          | F(1,34) = 0.263    | 0.214   | ns |
|                                                           | Treatment * sex    | F(1,34) = 0.08     | 0.778   | ns |
| <i>No difference</i>                                      |                    |                    |         |    |

Supplementary Table 3

| MORPHINE-INDUCED MOTOR SENSITIZATION                |                        |                   |         |    |
|-----------------------------------------------------|------------------------|-------------------|---------|----|
| Induction                                           | RM-2 way ANOVA         | F                 | p-value |    |
| Distance moved                                      | Sex                    | F(1,32) = 0.04    | 0.95    | ns |
| 10 min bins                                         | Treatment              | F(1,32) = 0.034   | 0.854   | ns |
|                                                     | Treatment * sex        | F(1,32) = 0.12    | 0.731   | ns |
|                                                     | Treatment * time       | F(23,736) = 0.153 | 0.917   | ns |
|                                                     | Treatment * time * sex | F(23,736) = 0.146 | 0.922   | ns |
|                                                     | <i>No difference</i>   |                   |         |    |
| Challenge                                           | RM-2 way ANOVA         | F                 | p-value |    |
| Δ Distance moved Challenge-Induction                | Sex                    | F(1,32) = 3.0     | 0.93    | ns |
| 10 min bins                                         | Treatment              | F(1,32) = 12.014  | 0.002   | ** |
|                                                     | Treatment * sex        | F(1,32) = 0.654   | 0.425   | ns |
|                                                     | Treatment * time       | F(23,736) = 1.649 | 0.024   | *  |
|                                                     | Treatment * time * sex | F(23,736) = 2.915 | 0.166   | ns |
| <i>Upregulation of morphine motor sensitization</i> |                        |                   |         |    |

  

| SUCROSE PREFERENCE     |                                 |                 |         |    |
|------------------------|---------------------------------|-----------------|---------|----|
| Sucrose preference (%) | RM-2 way ANOVA                  | F               | p-value |    |
|                        | Sex                             | F(1,33) = 0.413 | 0.413   | ns |
|                        | Treatment                       | F(1,33) = 0.0   | 0.995   | ns |
|                        | Treatment * sex                 | F(1,33) = 2.347 | 0.135   | ns |
|                        | Treatment * concentration       | F(2,66) = 0.362 | 0.688   | ns |
|                        | Treatment * concentration * sex | F(2,66) = 2.317 | 0.109   | ns |
| <i>No difference</i>   |                                 |                 |         |    |
